# Supplementary material for: Sensitivity analysis of the PALM model system 6.0 in the urban environment
Source: Copernicus journal article supplement (doi:10.5194/gmd-14-4443-2021), 2021-07-20
Supplement: Supplementary file 1 [file TableS01.xlsx]

## Sheet: List1
Category	Surface material	Storage material	Emissivity	Heat conductivity of the skin layer	Roughness	Roughness_h	Surface skin layer heat capacity	Thickness	Volumetric heat capacity	Thermal conductivity
				[W m-2 K-1]			[J m-2 K-1]	[m]	[J m-3 K-1]	[W m-1 K-1]
1	concrete	concrete/gravel/sand/soil	0.85	66.1157	0.001	0.001	22264	1	1360000	1.6
2	concrete panel	concrete/gravel/sand/soil	0.82	66.1157	0.002	0.002	22264	1	1360000	1.6
3	concrete tiles	concrete/sand/soil	0.63	66.1157	0.003	0.003	22264	1	1360000	1.6
4	paving blocks	concrete/gravel	0.45	66.1157	0.003	0.003	22264	1	1360000	1.6
5	pervious paving blocks	concrete/gravel/soil	0.68	66.1157	0.006	0.006	22264	1	1360000	1.6
6	pavement cobble - large	granite/gravel/soil	0.51	103.306	0.01	0.01	28628.6	1	1360000	1.6
7	pavement cobble - middle	granite/gravel/soil	0.48	103.306	0.006	0.006	28628.6	1	1360000	1.6
8	pavement cobble - small	granite/gravel/soil	0.45	103.306	0.005	0.005	28628.6	1	1360000	1.6
9	tartan	plastic/sand	0.92	20.6612	0.002	0.002	15972	1	1280000	1.5
10	playground	plastic/sand	0.91	41.3223	0.004	0.004	15972	1	1328000	1.5
11	mud, dust, soil	soil	0.28	41.3223	0.02	0.02	21780	1	1328000	1.5
12	sand	sand	0.76	41.3223	0.01	0.01	16571	1	1328000	1.5
13	grass	soil	0.93	41.3223	0.01	0.01	5021.5	1	1328000	1.5
14	gravel	soil	0.28	41.3223	0.02	0.02	19360	1	1328000	1.5
15	clay	soil	0.75	41.3223	0.005	0.005	16068.8	1	1328000	1.5
16	winter garden	soil	0.87	41.3223	0.05	0.05	4840	1	1328000	1.5
17	white pavement cobble	white granite/gravel/soil	0.82	53.719	0.005	0.005	16736.7	1	1360000	1.6
18	white + grey pavement cobble	white granite granite/gravel/soil	0.64	57.8512	0.005	0.005	19771.4	1	1360000	1.6
19	rail track	gravel/soil	0.65	82.6446	0.03	0.03	22022	1	1360000	1.6
20	road markings on asphalt	asphalt concrete/gravel	0.9	41.3223	0.002	0.002	14471.6	1	1360000	1.6
21	road markings on cobblestones	granite/gravel/soil	0.55	103.306	0.006	0.006	28628.6	1	1360000	1.6
22	asphalt (general)	asphalt concrete/gravel	0.93	41.3223	0.002	0.002	14471.6	1	1360000	1.6
23	low vegetation and bushes	vegetation/soil	0.8	41.3223	0.05	0.05	4840	1	1328000	1
24	low bushes (unresolved)	vegetation/soil	0.86	41.3223	0.2	0.2	4840	1	1328000	1
25	tropical wood	wood/asphalt/gravel	0.92	41.3223	0.01	0.01	4840	1	1328000	1
26	gravel (small stones)	gravel/soil	0.59	66.1157	0.01	0.01	13612.5	1	1328000	1.5
27	smooth brick	brick/gravel	0.97	66.1157	0.002	0.002	21296	1	1328000	1
28	fountain	water/smooth brick	0.91	24.7934	0.1	0.1	50662.7	1	6699200	0.6
29	stream	water	0.95	24.7934	0.2	0.2	50662.7	1	6699200	0.6
30	small river	water	0.96	24.7934	0.1	0.1	50662.7	1	6699200	0.6
31	river	water	0.97	24.7934	0.01	0.01	50662.7	1	6699200	0.6
32	asphalt (roads)	asphalt concrete/gravel	0.93	41.3223	0.002	0.002	14471.6	1	1360000	1.6
33	asphalt (pavement)	asphalt/gravel	0.93	41.3223	0.002	0.002	14471.6	1	1360000	1.6
34	white pavement cobble with asphalt	white granite asphalt/gravel/soil	0.55	82.6446	0.05	0.05	22022	1	1360000	1.6
101	metal palte	brick	0.93	118.064	0.0002	0.0002	4235	0.35	1512000	1
102	brick	brick	0.93	118.064	0.0012	0.0012	6403.32	0.35	1512000	1
103	smooth brick	brick	0.93	118.064	0.001	0.001	6403.32	0.35	1512000	1
104	smooth pavement	brick	0.93	82.6446	0.0003	0.0003	7453.6	0.35	1512000	1
105	smooth cobblestone	brick	0.93	59.0319	0.0007	0.0007	7453.6	0.35	1512000	1
106	plaster	brick	0.93	82.6446	0.0009	0.0009	7453.6	0.35	1512000	1
107	plaster	burnt breeze block	0.93	82.6446	0.0009	0.0009	6776	0.35	1008000	0.7
108	plaster + bricks	brick	0.93	118.064	0.001	0.001	6555.78	0.35	1512000	1
109	plaster + vegetation	brick	0.95	118.064	0.005	0.005	6555.78	0.35	1512000	1
110	plaster + tiling	brick	0.93	118.064	0.001	0.001	7411.25	0.35	1512000	1
111	plaster + glass	brick	0.93	82.6446	0.0007	0.0007	8893.5	0.35	1512000	1
112	plastic	brick	0.93	82.6446	0.0007	0.0007	8470	0.35	1512000	1
113	glass	brick	0.92	118.064	0.0007	0.0007	5505.5	0.35	1512000	1
114	glass	insulation	0.92	118.064	0.0007	0.0007	4235	0.35	1008000	0.5
115	plaster + glass	palena tvarnice	0.92	137.741	0.0007	0.0007	3630	0.3	1008000	0.5
116	plaster + glass	insulation	0.93	137.741	0.0008	0.0008	8893.5	0.3	1008000	0.5
117	decorated plaster	brick	0.93	118.064	0.0011	0.0011	7453.6	0.35	1512000	1
118	glass	metal/concrete	0.92	118.064	0.0007	0.0007	4235	0.35	1008000	1
119	igelite + plastic	glass	0.92	118.064	0.0007	0.0007	4235	0.35	1008000	0.2
120	concrete	concrete	0.92	118.064	0.001	0.001	4235	0.35	1008000	1
121	metal plate/glass	metal plate/glass	0.92	118.064	0.01	0.01	4235	0.35	1008000	0.2
122	wood	insulation/metal plates	0.92	118.064	0.01	0.01	4235	0.35	1008000	0.2
123	wood	wood	0.92	118.064	0.005	0.005	4235	0.35	1008000	0.5
201	sheet metal	softwood	0.93	68.8705	0.001	0.001	4152.72	0.3	1144000	0.3
202	concrete/fired tile	concrete/brick/wood	0.7	82.6446	0.01	0.01	6352.5	0.35	1144000	0.5
203	asphalt belt	softwood	0.93	68.8705	0.001	0.001	3473.18	0.3	1144000	0.3
204	grass	soil/concrete	0.96	91.8274	0.01	0.01	8167.5	0.45	1500000	1
205	garden	soil/concrete	0.96	91.8274	0.05	0.05	8167.5	0.45	1500000	1
206	glass	concrete/metal	0.92	118.064	0.0007	0.0007	5505.5	0.35	1512000	1
207	gravel	soil/concrete	0.59	66.1157	0.01	0.01	13612.5	1	1328000	1.5
208	air conditioners	gravel/concrete	0.91	24.7934	0.1	0.1	50662.7	1	6699200	0.6
209	concrete	concrete	0.85	66.1157	0.001	0.001	22264	1	1360000	1.6
210	plastic	glass/concrete	0.93	82.6446	0.0007	0.0007	8470	0.35	1512000	1
