# Supplementary material for: Sensitivity analysis of the PALM model system 6.0 in the urban environment
Source: Copernicus journal article supplement (doi:10.5194/gmd-14-4443-2021), 2021-07-20
Supplement: Supplementary file 2 [file TableS02.xlsx]

## Sheet: info
	ID	Name	Note	1) Areas
	0	base	basecase	Delnicka (east-west street)	SENS-Selection-02-Delnicka.jpg
	A) Sensitivity to Particular Parameters			Komunardu (north-south street)	SENS-Selection-03-Komunardu.jpg
	1	SA01	albedo increase +20%; all surfaces	Streets (both streets)	SENS-Selection-05-Streets.jpg
	2	SA02	albedo decrease –20%	Domain (whole domain)	SENS-Selection-01-Domain.jpg
	3	SA03	emissivity average for whole domain	Courtyards (all courtyards)	SENS-Selection-04-Courtyards.jpg
	4	SA04	avg. emissivity +20 %	2) Prefixes
	5	SA05	avg. emissivity –20 %	abs (absolute values)
	6	SA06	roughness increase +20%	dif (difference, scenario - basecase)
	7	SA07	roughness decrease –20%	rel (relative, in %)
	8	SA08	thickness increase +20%
	9	SA09	thickness decrease –20%
	10	SA10	transmissivity of windows increase +20%
	11	SA11	transmissivity of windows decrease –20%
	12	SA12	thermal conductivity inside of wall increase +20%
	13	SA13	thermal conductivity inside of wall decrease –20%
	14	SA14	volumetric heat capacity increase +20%
	15	SA15	volumetric heat capacity decrease –20%
	16	SA16	window fraction increase +20%
	17	SA17	window fraction decrease –20%
	18	SA18	leaf area density increase +20%
	19	SA19	leaf area density decrease –20%
	20	SA20	soil moisture increase +20%
	21	SA21	soil moisture decrease –20%
	B) Sensitivity to Urban Climate Measures
	22	SB01	building height increase (street canyon ratio) by 20%
	23	SB02	building height decrease (street canyon ratio) by 20%
	24	SB03	all surfaces (pavement) asphalt
	25	SB04	all surfaces (pavement) concrete
	26	SB05	all surfaces (pavement) cobblestones
	27	SB06	all surfaces (pavement) cobblestones white
	28	SB07	tram green line
	29	SB08	all surfaces (building) insulated (finaly removed because of numerical instability)
	30	SB09	blue infrastructure - river instead of tram line, roads were changed to grass
	31	SB10	grey city model - green areas to asphalt, deleted trees
	32	SB11	grey city model - asphalt except main roads / pavements changed to grass, all trees deleted
	33	SB12	green city model - trees everywhere; randomly placed acer platanoides
	34	SB13	new tree alley - Delnicka, center-line
	35	SB14	new tree alley - Delnicka, both-side
	36	SB15	new tree alley - both streets, both-side
	37	SB16	all trees coniferous
	38	SB17	include anthropogenic heat flux

## Sheet: abs_Delnicka
		theta													t_surf													MRT													PET
		AVG	00-03	03-06	06-09	9-12	12-15	15-18	18-21	21-24	MIN	TIME	MAX	TIME	AVG	00-03	03-06	06-09	9-12	12-15	15-18	18-21	21-24	MIN	TIME	MAX	TIME	AVG	00-03	03-06	06-09	9-12	12-15	15-18	18-21	21-24	MIN	TIME	MAX	TIME	AVG	00-03	03-06	06-09	9-12	12-15	15-18	18-21	21-24
	base	24.33	17.678	17.998	22.473	27.51	30.021	29.621	26.564	22.778	17.144	03:40	30.488	14:40	31.054	21.334	20.927	32.403	40.591	42.846	37.163	28.593	24.573	19.744	04:00	43.229	12:50	39.058	20.313	26.435	51.616	58.551	59.541	45.607	27.174	23.228	19.244	03:00	60.818	12:20	27.909	14.971	17.787	31.71	38.331	40.701	34.706	24.785	20.282
	SA01	24.232	17.641	17.92	22.355	27.386	29.862	29.504	26.471	22.716	17.095	03:40	30.182	14:40	30.755	21.247	20.837	31.989	40.092	42.32	36.738	28.385	24.432	19.671	03:40	42.829	13:00	39.596	20.25	26.762	52.732	60.027	60.77	46.063	27.043	23.119	19.168	03:00	62.18	12:20	28.13	14.944	17.92	32.276	38.979	41.216	34.761	24.674	20.275
	SA02	24.405	17.707	18.062	22.603	27.613	30.083	29.723	26.631	22.82	17.165	03:40	30.623	14:30	31.318	21.416	21.003	32.847	41.073	43.244	37.521	28.754	24.685	19.796	03:50	43.604	12:30	38.542	20.369	26.127	50.596	57.17	58.332	45.162	27.272	23.306	19.289	03:10	59.38	12:20	27.676	15.013	17.674	31.465	37.542	40.009	34.589	24.832	20.281
	SA03	24.326	17.683	18.019	22.464	27.532	29.965	29.593	26.565	22.787	17.162	03:30	30.411	14:40	31.135	21.414	21.009	32.518	40.688	42.893	37.239	28.671	24.651	19.819	03:40	43.358	12:20	38.994	20.299	26.417	51.545	58.455	59.401	45.497	27.134	23.204	19.232	03:10	60.744	12:20	27.858	14.969	17.855	31.742	38.223	40.488	34.578	24.744	20.266
	SA04	24.26	17.604	17.925	22.416	27.411	29.946	29.573	26.494	22.71	17.051	03:40	30.363	14:40	30.745	21.095	20.695	32.113	40.19	42.464	36.81	28.293	24.297	19.516	04:00	42.847	13:00	39.438	20.641	26.731	52.001	58.997	60.043	46.051	27.492	23.55	19.557	03:00	61.27	12:20	27.967	15.005	17.711	31.845	38.244	40.88	34.796	24.869	20.387
	SA05	24.435	17.81	18.137	22.566	27.585	30.07	29.707	26.695	22.91	17.311	03:40	30.49	14:30	31.805	21.956	21.487	33.135	41.455	43.717	38.075	29.347	25.265	20.324	04:00	44.084	12:50	38.007	19.47	25.643	50.541	57.241	58.096	44.366	26.318	22.382	18.438	03:00	59.4	12:20	27.527	14.86	17.495	31.331	37.811	39.99	34.26	24.49	19.975
	SA06	24.335	17.717	18.046	22.498	27.525	29.996	29.596	26.529	22.77	17.198	03:40	30.369	14:30	30.74	21.173	20.784	32.072	40.09	42.264	36.758	28.37	24.407	19.606	03:40	42.653	13:00	38.818	20.139	26.241	51.371	58.198	59.156	45.347	27.004	23.084	19.054	03:00	60.409	12:20	27.773	14.907	17.705	31.516	38.076	40.446	34.573	24.718	20.241
	SA07	24.291	17.597	17.927	22.381	27.424	29.99	29.62	26.593	22.795	17.053	03:40	30.415	14:40	31.397	21.535	21.073	32.774	41.106	43.408	37.629	28.866	24.786	19.872	04:00	43.798	12:50	39.282	20.521	26.576	51.827	58.767	59.796	45.928	27.409	23.436	19.434	03:00	61.009	12:20	27.965	14.971	17.754	31.882	38.267	40.717	34.864	24.89	20.376
	SA08	24.331	17.679	17.987	22.481	27.515	30.034	29.611	26.563	22.777	17.13	03:40	30.517	14:40	31.055	21.329	20.915	32.394	40.608	42.851	37.177	28.597	24.572	19.735	04:00	43.275	12:50	39.059	20.31	26.426	51.614	58.556	59.547	45.618	27.178	23.225	19.25	03:00	60.774	12:20	27.865	14.955	17.653	31.615	38.295	40.689	34.697	24.782	20.23
	SA09	24.32	17.672	17.993	22.459	27.515	29.96	29.626	26.562	22.772	17.17	03:30	30.393	14:30	31.041	21.324	20.925	32.411	40.575	42.767	37.164	28.597	24.562	19.731	04:00	43.242	12:20	39.05	20.306	26.432	51.617	58.54	59.501	45.607	27.176	23.218	19.224	03:00	60.849	12:20	27.859	14.929	17.751	31.782	38.183	40.49	34.741	24.794	20.202
	SA10	24.328	17.675	17.99	22.492	27.523	30.003	29.607	26.559	22.777	17.185	03:40	30.577	14:40	31.051	21.334	20.93	32.398	40.62	42.811	37.151	28.588	24.574	19.754	04:00	43.286	13:00	39.042	20.313	26.429	51.592	58.526	59.494	45.587	27.17	23.227	19.24	03:00	60.774	12:20	27.882	14.954	17.766	31.619	38.385	40.609	34.663	24.768	20.29
	SA11	24.321	17.672	18.003	22.46	27.495	29.995	29.598	26.566	22.776	17.13	03:40	30.415	14:40	31.052	21.318	20.928	32.421	40.572	42.853	37.155	28.599	24.574	19.742	03:50	43.247	12:20	39.069	20.301	26.445	51.647	58.576	59.571	45.617	27.175	23.223	19.232	03:00	60.872	12:20	27.892	14.923	17.769	31.765	38.241	40.694	34.686	24.783	20.279
	SA12	24.302	17.719	18.015	22.386	27.386	29.937	29.585	26.577	22.81	17.218	03:40	30.458	14:40	30.916	21.548	21.031	31.971	39.991	42.365	36.993	28.688	24.743	19.943	04:00	42.771	12:30	38.984	20.456	26.508	51.425	58.204	59.248	45.491	27.209	23.331	19.405	03:00	60.488	12:20	27.816	15.008	17.684	31.553	37.987	40.506	34.662	24.805	20.321
	SA13	24.318	17.57	17.921	22.548	27.561	30.029	29.65	26.542	22.72	17.022	03:40	30.501	14:40	31.161	21	20.745	32.939	41.211	43.296	37.331	28.442	24.322	19.425	03:50	43.764	12:30	39.108	20.077	26.283	51.854	58.914	59.832	45.738	27.105	23.063	18.99	03:00	61.161	12:20	27.914	14.767	17.677	31.952	38.459	40.749	34.794	24.741	20.17
	SA14	24.337	17.77	18.072	22.455	27.431	29.931	29.599	26.596	22.841	17.252	03:40	30.312	14:30	30.988	21.66	21.139	32.058	40.081	42.382	37.013	28.756	24.816	20.053	04:00	42.75	13:00	39.064	20.577	26.638	51.52	58.299	59.288	45.519	27.27	23.405	19.508	03:00	60.563	12:20	27.854	15.039	17.867	31.688	38.069	40.434	34.593	24.802	20.345
	SA15	24.306	17.538	17.887	22.541	27.598	30.045	29.626	26.52	22.697	16.985	03:30	30.6	14:30	31.1	20.905	20.661	32.88	41.187	43.256	37.291	28.364	24.254	19.348	03:40	43.704	12:20	39.03	19.958	26.16	51.774	58.854	59.772	45.696	27.037	22.99	18.879	03:00	61.094	12:20	27.899	14.818	17.678	31.891	38.442	40.703	34.771	24.71	20.182
	SA16	24.291	17.638	17.964	22.487	27.474	29.933	29.6	26.497	22.731	17.112	03:40	30.297	14:40	31.016	21.306	20.89	32.435	40.568	42.743	37.123	28.54	24.522	19.708	04:00	43.184	12:20	38.959	20.223	26.383	51.612	58.479	59.387	45.465	27.014	23.109	19.181	03:00	60.713	12:20	27.823	14.9	17.644	31.855	38.176	40.46	34.635	24.663	20.249
	SA17	24.344	17.707	17.991	22.453	27.525	29.975	29.658	26.621	22.822	17.102	03:40	30.383	14:40	31.068	21.347	20.93	32.409	40.582	42.803	37.209	28.644	24.618	19.747	03:50	43.183	12:30	39.141	20.395	26.461	51.639	58.598	59.61	45.753	27.328	23.34	19.306	03:10	60.843	12:20	27.9	14.978	17.7	31.681	38.301	40.586	34.772	24.859	20.327
	SA18	24.317	17.662	17.979	22.5	27.461	29.981	29.619	26.559	22.778	17.169	03:40	30.427	14:40	31.035	21.315	20.903	32.417	40.499	42.798	37.184	28.592	24.569	19.729	03:40	43.299	13:00	39.011	20.301	26.4	51.552	58.437	59.44	45.569	27.167	23.224	19.217	03:00	60.653	12:20	27.865	14.915	17.697	31.808	38.09	40.661	34.783	24.755	20.21
	SA19	24.337	17.681	18.019	22.475	27.518	30.019	29.639	26.568	22.78	17.161	03:40	30.439	14:30	31.081	21.354	20.953	32.457	40.618	42.864	37.214	28.608	24.58	19.764	03:40	43.273	12:50	39.116	20.324	26.481	51.739	58.643	59.635	45.695	27.185	23.226	19.254	03:00	60.844	12:20	27.923	15.002	17.819	31.798	38.245	40.719	34.766	24.765	20.27
	SA20	24.321	17.67	17.996	22.468	27.491	29.985	29.627	26.558	22.773	17.175	03:40	30.317	14:40	31.022	21.32	20.908	32.401	40.547	42.77	37.116	28.564	24.548	19.737	04:10	43.235	12:50	39.042	20.304	26.425	51.616	58.531	59.501	45.586	27.159	23.212	19.231	03:00	60.779	12:20	27.9	14.95	17.747	31.808	38.319	40.668	34.689	24.774	20.245
	SA21	24.327	17.687	17.992	22.499	27.483	29.969	29.64	26.564	22.784	17.15	03:30	30.389	14:40	31.11	21.359	20.951	32.48	40.684	42.912	37.257	28.635	24.605	19.756	03:50	43.307	13:00	39.082	20.327	26.45	51.653	58.587	59.561	45.647	27.193	23.242	19.242	03:10	60.812	12:20	27.893	15.016	17.73	31.731	38.234	40.614	34.764	24.764	20.294
	SB01	24.368	17.881	18.151	22.518	27.441	29.913	29.59	26.59	22.864	17.365	03:40	30.346	14:30	30.978	21.625	21.027	32.245	39.956	42.441	37.102	28.683	24.742	20.043	03:40	42.799	13:00	38.83	20.937	25.932	51.013	57.491	58.811	45.117	27.59	23.746	19.832	03:00	59.993	12:20	28.157	15.588	17.801	32.06	38.313	40.942	34.879	25.117	20.556
	SB02	24.3	17.551	17.877	22.439	27.522	30.057	29.704	26.54	22.709	17.022	03:40	30.367	14:40	31.19	21.149	20.947	32.67	41.107	43.225	37.424	28.558	24.44	19.57	03:40	43.892	13:00	39.335	19.76	27.075	52.242	59.485	60.221	46.423	26.766	22.705	18.666	03:00	61.757	12:20	27.825	14.671	17.936	31.699	38.262	40.618	34.917	24.457	20.037
	SB03	24.339	17.685	17.995	22.516	27.531	30.002	29.623	26.577	22.783	17.176	03:50	30.447	14:40	31.137	21.373	20.963	32.535	40.764	42.968	37.247	28.642	24.603	19.772	03:50	43.398	12:20	39.007	20.343	26.424	51.511	58.377	59.373	45.572	27.203	23.25	19.269	03:00	60.674	12:20	27.874	15.016	17.758	31.715	38.227	40.562	34.671	24.783	20.265
	SB04	24.25	17.656	17.946	22.367	27.376	29.864	29.524	26.52	22.75	17.146	03:50	30.285	14:40	29.825	21.101	20.503	30.687	38.286	40.471	35.492	27.9	24.159	19.515	03:50	40.831	13:00	39.716	20.101	26.685	53.347	60.473	61.211	46.139	26.831	22.942	19.055	03:00	62.74	12:20	28.182	14.905	17.784	32.675	39.136	41.281	34.917	24.596	20.166
	SB05	24.348	17.729	18.03	22.539	27.495	29.98	29.637	26.573	22.803	17.176	03:40	30.501	14:30	30.479	21.334	20.862	31.575	39.224	41.378	36.362	28.479	24.62	19.75	03:50	41.707	13:00	38.705	19.704	26.11	51.747	58.608	59.375	45.035	26.472	22.587	18.687	03:00	60.747	12:20	27.807	14.854	17.68	31.997	38.272	40.493	34.566	24.524	20.074
	SB06	24.203	17.639	17.943	22.332	27.308	29.757	29.447	26.481	22.716	17.115	03:40	30.243	14:40	28.866	20.687	20.078	29.461	36.662	38.804	34.227	27.279	23.732	19.179	03:40	39.037	13:00	40.031	19.95	26.802	54.188	61.445	62.055	46.38	26.638	22.793	18.9	03:00	63.607	12:20	28.313	14.784	17.924	32.989	39.586	41.642	34.975	24.503	20.103
	SB07	24.255	17.607	17.98	22.395	27.399	29.874	29.541	26.507	22.733	17.099	03:40	30.352	14:40	30.417	20.759	20.662	32.144	39.85	41.979	36.188	27.813	23.945	19.33	03:40	42.522	12:30	38.854	20.125	26.373	51.564	58.309	59.26	45.285	26.9	23.018	19.087	03:00	60.571	12:20	27.808	14.898	17.881	31.738	38.088	40.432	34.519	24.625	20.281
	SB09	23.91	17.358	17.739	22.1	26.918	29.38	29.151	26.172	22.462	16.871	03:40	29.749	14:50	26.535	18.647	19.108	28.724	33.952	35.696	30.791	24.146	21.216	17.717	03:10	35.969	13:00	37.222	19.17	25.655	50.181	55.927	56.783	43.075	25.222	21.759	18.286	03:00	57.888	12:20	26.975	14.508	17.468	31.035	36.809	39.121	33.313	23.851	19.696
	SB10	24.396	17.747	18.057	22.524	27.541	30.034	29.736	26.688	22.838	17.208	03:50	30.394	14:30	31.8	21.879	21.393	33.322	41.699	44.009	38.089	29.103	24.905	20.173	04:00	44.36	13:00	40.552	20.648	27.489	54.384	61.259	62.318	47.423	27.522	23.374	19.487	03:00	63.438	12:20	28.73	15.531	18.581	33.141	39.37	42.099	35.773	25.015	20.332
	SB11	24.304	17.625	17.971	22.442	27.469	29.958	29.644	26.583	22.74	17.076	03:30	30.322	14:30	31.491	21.464	21.21	33.209	41.486	43.703	37.67	28.669	24.515	19.86	03:30	43.99	13:40	40.186	20.412	27.265	53.925	60.677	61.753	47.04	27.265	23.149	19.286	03:00	62.827	12:20	28.529	15.369	18.52	32.603	39.092	41.909	35.632	24.838	20.264
	SB12	23.874	17.577	17.884	22.031	26.813	29.243	28.802	26.043	22.598	17.085	03:30	29.58	14:40	25.851	19.909	19.187	24.385	31.248	33.121	29.877	25.857	23.221	18.848	04:00	33.935	12:30	29.678	19.682	20.856	32.893	41.82	40.876	32.952	25.638	22.707	18.874	03:10	43.932	11:10	24.519	15.848	16.998	24.306	31.444	32.912	29.439	24.3	20.909
	SB13	24.129	17.623	17.951	22.269	27.198	29.643	29.269	26.383	22.692	17.151	03:50	30.2	14:40	28.22	20.722	19.951	27.795	35.468	37.432	33.17	27.251	23.967	19.398	04:00	38.07	12:20	33.779	20.034	22.491	41.2	49.608	49.472	37.949	26.455	23.025	19.075	03:10	51.833	12:20	26.045	15.635	17.081	27.482	34.677	36.635	31.688	24.573	20.589
	SB14	23.955	17.587	17.897	22.063	26.955	29.341	28.937	26.229	22.629	17.124	03:40	29.651	14:20	26.13	20.063	19.264	24.287	32.348	33.891	29.851	26.019	23.321	18.954	04:10	35.044	12:20	30.097	19.728	20.726	33.073	44.148	42.137	32.457	25.772	22.738	18.86	03:10	46.145	11:10	24.534	15.689	16.771	24.144	32.278	33.261	29.048	24.274	20.802
	SB15	23.953	17.63	17.917	22.06	26.949	29.349	28.901	26.194	22.627	17.134	03:40	29.645	14:20	26.114	20.062	19.26	24.251	32.304	33.879	29.833	25.996	23.326	18.961	04:00	34.974	12:30	29.95	19.742	20.653	32.781	43.735	41.847	32.331	25.754	22.755	18.899	03:10	45.721	11:10	24.665	15.904	16.94	24.22	32.356	33.342	29.154	24.434	20.973
	SB16	24.33	17.682	18.016	22.463	27.519	29.973	29.626	26.581	22.783	17.157	03:30	30.464	14:30	31.205	21.45	21.005	32.619	40.853	43.035	37.371	28.688	24.62	19.806	04:00	43.375	12:50	39.359	20.376	26.544	52.218	59.14	60.171	45.954	27.239	23.232	19.249	03:00	61.379	12:20	28.026	15.105	17.907	31.846	38.475	40.86	34.941	24.815	20.261
	SB17	24.402	17.683	18.041	22.589	27.558	30.084	29.745	26.678	22.834	17.141	03:40	30.504	14:40	31.083	21.326	20.928	32.479	40.603	42.834	37.228	28.658	24.612	19.725	03:40	43.294	12:20	39.073	20.305	26.412	51.658	58.552	59.53	45.653	27.221	23.25	19.22	03:10	60.852	12:20	27.935	14.953	17.763	31.887	38.244	40.636	34.821	24.866	20.31
[truncated: 17 more columns]

## Sheet: abs_Domain
		theta													t_surf													MRT													PET
		AVG	00-03	03-06	06-09	9-12	12-15	15-18	18-21	21-24	MIN	TIME	MAX	TIME	AVG	00-03	03-06	06-09	9-12	12-15	15-18	18-21	21-24	MIN	TIME	MAX	TIME	AVG	00-03	03-06	06-09	9-12	12-15	15-18	18-21	21-24	MIN	TIME	MAX	TIME	AVG	00-03	03-06	06-09	9-12	12-15	15-18	18-21	21-24
	base	24.084	17.719	18.005	22.165	27.124	29.546	29.155	26.308	22.651	17.233	03:40	29.863	14:40	27.514	20.562	19.885	26.577	34.889	36.491	31.877	26.496	23.335	19.252	04:00	37.49	12:20	34.734	19.8	23.42	41.842	53.671	51.752	38.781	26.112	22.498	18.863	03:00	56.17	11:10	26.701	15.638	17.637	28.622	37.009	37.811	31.875	24.45	20.569
	SA01	23.973	17.679	17.917	22.029	26.981	29.385	29.019	26.195	22.58	17.162	03:40	29.661	14:40	27.037	20.402	19.714	26.076	33.983	35.6	31.292	26.144	23.085	19.106	04:00	36.449	12:30	35.268	19.711	23.693	43.008	55.244	53.006	39.195	25.933	22.35	18.774	03:00	57.842	11:10	26.93	15.606	17.713	29.203	37.779	38.324	32.006	24.321	20.486
	SA02	24.182	17.755	18.07	22.282	27.284	29.69	29.275	26.393	22.711	17.263	03:40	30.049	14:30	27.923	20.693	20.012	27.02	35.72	37.256	32.367	26.78	23.537	19.365	04:00	38.396	12:20	34.237	19.874	23.163	40.778	52.224	50.578	38.4	26.258	22.618	18.929	03:00	54.66	11:10	26.496	15.686	17.515	28.193	36.342	37.301	31.774	24.549	20.607
	SA03	24.084	17.717	18.015	22.153	27.142	29.526	29.151	26.306	22.66	17.244	03:30	29.849	14:40	27.537	20.572	19.898	26.602	34.928	36.518	31.905	26.517	23.353	19.264	04:00	37.555	12:20	34.711	19.809	23.423	41.815	53.612	51.674	38.741	26.107	22.506	18.868	03:00	56.083	11:10	26.678	15.617	17.66	28.641	36.952	37.725	31.831	24.439	20.561
	SA04	24.03	17.65	17.937	22.124	27.061	29.517	29.118	26.242	22.588	17.154	03:40	29.847	14:40	27.273	20.335	19.663	26.365	34.618	36.229	31.63	26.255	23.09	19.029	04:00	37.227	12:20	35.009	20.077	23.66	42.103	53.965	52.096	39.088	26.338	22.749	19.116	03:00	56.459	11:10	26.773	15.678	17.661	28.769	37.009	37.973	31.981	24.491	20.623
	SA05	24.179	17.837	18.134	22.231	27.187	29.609	29.23	26.429	22.775	17.378	03:20	29.903	14:40	27.989	20.982	20.286	26.996	35.407	37.051	32.411	26.98	23.802	19.666	04:00	38.085	12:20	34.015	19.155	22.835	41.141	52.803	50.773	37.963	25.546	21.899	18.257	03:00	55.27	11:10	26.438	15.499	17.458	28.333	36.612	37.366	31.585	24.289	20.361
	SA06	24.098	17.773	18.054	22.189	27.162	29.551	29.136	26.273	22.646	17.279	03:40	29.846	14:30	27.333	20.462	19.792	26.406	34.605	36.163	31.647	26.36	23.232	19.159	04:00	37.147	12:20	34.55	19.641	23.25	41.632	53.435	51.489	38.588	25.988	22.378	18.688	03:00	55.916	11:10	26.606	15.601	17.563	28.463	36.89	37.67	31.77	24.378	20.509
	SA07	24.051	17.626	17.918	22.075	27.071	29.536	29.173	26.343	22.665	17.149	03:40	29.868	14:40	27.736	20.695	19.992	26.775	35.224	36.878	32.159	26.677	23.483	19.366	04:00	37.887	12:20	34.989	20.034	23.625	42.097	53.961	52.076	39.078	26.327	22.713	19.097	03:00	56.463	11:10	26.784	15.662	17.645	28.74	37.059	37.952	32.019	24.558	20.635
	SA08	24.089	17.721	18	22.169	27.146	29.561	29.151	26.308	22.653	17.223	03:40	29.91	14:40	27.517	20.563	19.88	26.577	34.901	36.497	31.883	26.499	23.336	19.247	04:00	37.505	12:20	34.736	19.8	23.416	41.841	53.676	51.756	38.785	26.114	22.498	18.859	03:00	56.158	11:10	26.688	15.638	17.596	28.58	37.008	37.821	31.877	24.445	20.543
	SA09	24.084	17.716	17.997	22.16	27.139	29.537	29.165	26.309	22.651	17.237	03:30	29.839	14:40	27.512	20.56	19.881	26.579	34.889	36.477	31.882	26.498	23.333	19.249	04:00	37.525	12:20	34.733	19.798	23.416	41.843	53.671	51.74	38.785	26.114	22.496	18.853	03:00	56.141	11:10	26.685	15.625	17.594	28.647	36.991	37.755	31.887	24.45	20.534
	SA10	24.083	17.718	18	22.166	27.13	29.542	29.151	26.304	22.654	17.25	03:40	29.919	14:40	27.511	20.563	19.882	26.573	34.886	36.483	31.877	26.493	23.336	19.251	04:00	37.488	12:20	34.717	19.801	23.41	41.814	53.637	51.709	38.759	26.11	22.5	18.859	03:00	56.144	11:10	26.69	15.634	17.599	28.648	36.986	37.783	31.876	24.444	20.552
	SA11	24.086	17.719	18.012	22.155	27.141	29.543	29.155	26.31	22.652	17.228	03:40	29.894	14:40	27.516	20.56	19.887	26.579	34.893	36.493	31.88	26.499	23.337	19.254	04:00	37.518	12:20	34.751	19.798	23.43	41.872	53.708	51.79	38.803	26.113	22.497	18.858	03:00	56.193	11:10	26.687	15.623	17.629	28.582	36.981	37.802	31.868	24.443	20.567
	SA12	24.064	17.769	18.04	22.098	27.032	29.471	29.11	26.31	22.685	17.305	03:30	29.812	14:40	27.359	20.681	19.958	26.307	34.361	36.052	31.652	26.463	23.396	19.377	04:00	36.999	12:30	34.663	19.906	23.491	41.713	53.39	51.498	38.638	26.102	22.562	18.985	03:00	55.881	11:10	26.631	15.686	17.626	28.526	36.773	37.613	31.783	24.444	20.598
	SA13	24.085	17.627	17.936	22.216	27.197	29.606	29.199	26.301	22.598	17.127	03:40	29.927	14:40	27.655	20.37	19.754	26.892	35.457	36.944	32.103	26.497	23.221	19.052	03:50	38.076	12:20	34.794	19.628	23.289	41.996	53.968	52.029	38.946	26.106	22.393	18.658	03:00	56.484	11:10	26.717	15.508	17.559	28.757	37.115	37.917	31.966	24.435	20.477
	SA14	24.099	17.815	18.09	22.141	27.072	29.487	29.137	26.333	22.715	17.353	03:30	29.807	14:30	27.45	20.796	20.068	26.392	34.45	36.12	31.738	26.552	23.483	19.489	04:00	37.058	12:20	34.744	20.019	23.607	41.802	53.481	51.553	38.699	26.163	22.63	19.097	03:00	55.963	11:10	26.688	15.739	17.711	28.613	36.855	37.659	31.841	24.471	20.619
	SA15	24.058	17.578	17.883	22.19	27.196	29.593	29.176	26.274	22.575	17.068	03:30	29.956	14:40	27.567	20.246	19.64	26.81	35.405	36.875	32.022	26.405	23.134	18.938	03:40	38.021	12:20	34.708	19.503	23.163	41.9	53.896	51.965	38.877	26.041	22.323	18.54	03:00	56.413	11:10	26.675	15.464	17.493	28.678	37.113	37.871	31.924	24.404	20.456
	SA16	24.048	17.681	17.987	22.161	27.105	29.502	29.119	26.231	22.602	17.208	03:40	29.782	14:40	27.478	20.537	19.862	26.573	34.866	36.438	31.834	26.433	23.279	19.228	04:00	37.47	12:20	34.64	19.713	23.378	41.821	53.605	51.632	38.637	25.952	22.38	18.797	03:00	56.082	11:10	26.633	15.573	17.58	28.637	36.934	37.688	31.813	24.341	20.502
	SA17	24.112	17.753	18.004	22.157	27.15	29.548	29.206	26.378	22.704	17.216	03:40	29.889	14:40	27.543	20.582	19.892	26.586	34.905	36.502	31.926	26.557	23.392	19.264	04:00	37.528	12:20	34.824	19.884	23.449	41.867	53.73	51.838	38.932	26.271	22.618	18.917	03:00	56.24	11:10	26.738	15.654	17.602	28.64	37.041	37.815	31.975	24.546	20.629
	SA18	24.068	17.714	17.993	22.155	27.102	29.515	29.126	26.295	22.648	17.245	03:30	29.784	14:40	27.472	20.553	19.867	26.536	34.798	36.399	31.826	26.471	23.324	19.245	04:00	37.39	12:20	34.636	19.794	23.367	41.681	53.446	51.539	38.672	26.091	22.495	18.851	03:00	55.931	11:10	26.659	15.632	17.613	28.584	36.904	37.708	31.837	24.442	20.554
	SA19	24.103	17.712	18.014	22.174	27.166	29.58	29.194	26.323	22.657	17.232	03:40	29.917	14:40	27.568	20.566	19.897	26.643	35	36.601	31.958	26.531	23.348	19.256	04:00	37.601	12:20	34.865	19.797	23.484	42.066	53.967	52.026	38.938	26.139	22.5	18.855	03:00	56.444	11:10	26.728	15.605	17.599	28.725	37.071	37.912	31.953	24.439	20.519
	SA20	24.076	17.711	17.997	22.147	27.114	29.53	29.157	26.302	22.647	17.237	03:40	29.829	14:40	27.436	20.537	19.853	26.52	34.768	36.334	31.76	26.429	23.284	19.227	04:00	37.361	12:20	34.7	19.787	23.403	41.816	53.623	51.684	38.735	26.08	22.474	18.843	03:00	56.097	11:10	26.665	15.617	17.589	28.592	36.954	37.765	31.844	24.424	20.536
	SA21	24.093	17.724	18.004	22.179	27.14	29.541	29.176	26.315	22.662	17.227	03:30	29.863	14:40	27.63	20.592	19.921	26.679	35.105	36.727	32.036	26.579	23.398	19.286	03:50	37.748	12:20	34.783	19.813	23.436	41.886	53.756	51.842	38.851	26.151	22.529	18.875	03:00	56.24	11:10	26.718	15.63	17.615	28.668	37.014	37.839	31.931	24.459	20.583
	SB01	24.097	17.923	18.162	22.127	27.034	29.431	29.062	26.303	22.734	17.449	03:40	29.737	14:30	27.282	20.726	19.976	26.233	34.236	35.799	31.487	26.414	23.384	19.439	04:00	36.859	12:20	34.285	20.302	23.26	40.586	52.505	50.356	37.978	26.385	22.91	19.357	03:00	55.215	11:10	26.563	15.976	17.68	28.144	36.537	37.262	31.586	24.596	20.721
	SB02	24.071	17.57	17.879	22.158	27.197	29.626	29.256	26.298	22.583	17.059	03:40	29.937	14:40	27.788	20.44	19.848	26.978	35.593	37.215	32.329	26.598	23.302	19.112	03:40	38.162	12:10	35.221	19.311	23.716	43.125	54.885	53.117	39.721	25.823	22.069	18.355	03:00	57.153	11:10	26.979	15.442	17.793	29.287	37.694	38.492	32.394	24.337	20.391
	SB03	24.112	17.723	18.009	22.208	27.17	29.598	29.194	26.333	22.665	17.238	03:40	29.922	14:40	27.881	20.64	19.985	27.01	35.652	37.227	32.362	26.716	23.456	19.32	03:50	38.33	12:20	34.599	19.91	23.418	41.476	53.059	51.343	38.727	26.242	22.618	18.959	03:00	55.365	11:10	26.638	15.672	17.613	28.487	36.702	37.656	31.868	24.512	20.592
	SB04	24.067	17.705	17.989	22.137	27.105	29.521	29.141	26.297	22.644	17.23	03:30	29.844	14:40	27.367	20.532	19.822	26.347	34.639	36.23	31.686	26.409	23.27	19.22	04:00	37.256	12:20	34.853	19.81	23.48	42.116	53.939	52.014	38.885	26.09	22.489	18.867	03:00	56.394	11:10	26.735	15.633	17.618	28.773	37.098	37.885	31.912	24.429	20.535
	SB05	24.116	17.75	18.032	22.206	27.156	29.573	29.198	26.33	22.68	17.257	03:30	29.959	14:40	27.637	20.645	19.976	26.694	35.038	36.598	32.028	26.649	23.471	19.331	04:00	37.616	12:20	34.482	19.655	23.28	41.566	53.181	51.325	38.519	25.969	22.362	18.725	03:00	55.493	11:10	26.593	15.607	17.578	28.535	36.698	37.601	31.813	24.403	20.511
	SB06	24.043	17.706	17.981	22.121	27.076	29.462	29.103	26.271	22.622	17.22	03:40	29.793	14:40	26.997	20.373	19.659	25.915	33.989	35.564	31.21	26.164	23.099	19.078	04:00	36.503	12:30	34.964	19.754	23.505	42.412	54.345	52.316	38.946	26.01	22.424	18.814	03:00	56.874	11:10	26.776	15.602	17.634	28.902	37.285	37.975	31.917	24.386	20.506
	SB07	24.051	17.685	17.986	22.133	27.087	29.489	29.126	26.277	22.628	17.214	03:40	29.823	14:40	27.302	20.372	19.777	26.508	34.66	36.133	31.58	26.254	23.129	19.117	03:40	37.174	12:20	34.652	19.726	23.379	41.813	53.584	51.613	38.668	26.015	22.418	18.793	03:00	56.032	11:10	26.654	15.59	17.623	28.616	36.955	37.698	31.804	24.393	20.555
	SB09	23.831	17.505	17.84	21.976	26.816	29.221	28.884	26	22.403	17.043	03:30	29.528	14:50	25.554	19.197	19.004	25.37	32.188	33.459	29.147	24.389	21.68	18.211	03:40	34.257	12:20	33.923	19.204	23.032	41.361	52.586	50.578	37.692	25.174	21.756	18.349	03:00	54.978	11:10	26.262	15.347	17.446	28.392	36.343	37.118	31.3	23.951	20.195
	SB10	24.239	17.76	18.061	22.256	27.288	29.739	29.466	26.56	22.779	17.265	03:30	30.076	14:30	29.062	21.293	20.556	28.336	37.579	39.265	33.932	27.578	23.955	19.768	03:40	40.345	12:30	38.592	20.16	25.786	48.668	61.753	59.346	43.38	26.918	22.721	19.088	03:00	64.356	11:10	28.069	15.473	18.284	31.129	40.049	40.853	33.797	24.602	20.367
	SB11	24.059	17.565	17.937	22.152	27.097	29.505	29.251	26.368	22.601	17.079	03:30	29.808	14:40	27.68	19.366	19.661	28.567	37.171	37.682	31.591	25.355	22.049	18.312	03:10	39.326	12:10	37.035	19.318	25.035	47.005	58.836	56.62	41.702	25.894	21.874	18.37	03:00	61.179	11:10	27.29	15.1	17.977	30.207	38.564	39.464	32.916	24.113	19.979
	SB12	23.832	17.694	17.96	21.954	26.774	29.176	28.657	25.909	22.535	17.219	03:30	29.422	14:40	25.32	19.841	19.066	23.311	30.864	32.578	28.928	25.255	22.718	18.763	04:00	33.525	12:20	30.292	19.529	20.801	32.905	45.024	43.091	33.201	25.459	22.33	18.729	03:00	48.138	11:10	24.981	15.944	17.065	24.954	33.33	34.115	29.471	24.204	20.766
	SB13	24.033	17.705	17.988	22.125	27.058	29.468	29.065	26.238	22.615	17.229	03:40	29.784	14:40	27.011	20.43	19.693	25.776	34.005	35.557	31.176	26.24	23.209	19.17	04:00	36.625	12:20	33.766	19.73	22.691	39.953	52.018	49.921	37.406	25.961	22.447	18.812	03:00	54.606	11:10	26.355	15.748	17.495	27.923	36.328	37.078	31.303	24.38	20.584
	SB14	23.991	17.708	17.978	22.076	27.012	29.393	28.984	26.183	22.592	17.217	03:40	29.673	14:30	26.645	20.316	19.573	25.163	33.458	34.942	30.606	26.013	23.087	19.092	04:00	36.101	12:20	33.098	19.679	22.355	38.493	51.005	48.613	36.427	25.824	22.389	18.782	03:00	53.702	11:10	26.072	15.783	17.448	27.27	35.882	36.464	30.811	24.306	20.609
	SB15	23.962	17.721	17.978	22.046	26.962	29.358	28.916	26.136	22.582	17.237	03:40	29.597	14:20	26.466	20.237	19.504	24.962	33.012	34.618	30.434	25.914	23.047	19.039	04:00	35.569	12:20	32.691	19.653	22.216	37.838	49.766	47.756	36.134	25.773	22.391	18.776	03:00	52.529	11:10	26.025	15.903	17.543	27.039	35.507	36.3	30.825	24.386	20.698
	SB16	24.112	17.718	18.018	22.193	27.171	29.586	29.203	26.342	22.664	17.226	03:30	29.912	14:30	27.812	20.694	20.026	27.003	35.516	37.037	32.185	26.637	23.397	19.348	04:00	38.189	12:20	35.526	19.846	23.889	43.346	55.503	53.386	39.538	26.206	22.498	18.872	03:00	58.001	11:10	26.993	15.625	17.802	29.2	37.698	38.467	32.187	24.456	20.509
	SB17	24.109	17.719	18.011	22.193	27.153	29.569	29.201	26.35	22.672	17.22	03:40	29.894	14:40	27.524	20.557	19.876	26.593	34.891	36.502	31.904	26.522	23.35	19.241	04:00	37.538	12:20	34.742	19.793	23.4	41.852	53.668	51.77	38.806	26.138	22.508	18.852	03:00	56.171	11:10	26.704	15.621	17.604	28.663	36.978	37.822	31.916	24.47	20.562
[truncated: 17 more columns]

## Sheet: abs_Komunardu
		theta													t_surf													MRT													PET
		AVG	00-03	03-06	06-09	9-12	12-15	15-18	18-21	21-24	MIN	TIME	MAX	TIME	AVG	00-03	03-06	06-09	9-12	12-15	15-18	18-21	21-24	MIN	TIME	MAX	TIME	AVG	00-03	03-06	06-09	9-12	12-15	15-18	18-21	21-24	MIN	TIME	MAX	TIME	AVG	00-03	03-06	06-09	9-12	12-15	15-18	18-21	21-24
	base	24.086	17.721	18.019	22.224	27.342	29.466	28.972	26.288	22.66	17.191	03:40	29.721	13:50	26.042	20.192	19.342	23.312	33.959	34.032	28.828	25.664	23.004	18.96	03:50	36.969	12:20	32.246	19.835	21.872	35.492	53.64	46.694	32.127	25.686	22.626	18.946	03:00	58.499	11:10	24.876	15.16	16.586	24.928	35.582	34.358	28.353	23.792	20.248
	SA01	23.98	17.678	17.938	22.113	27.205	29.314	28.823	26.178	22.59	17.114	03:40	29.46	14:00	25.533	20.024	19.167	22.896	32.857	32.979	28.3	25.302	22.737	18.801	03:40	35.69	12:00	32.695	19.747	22.105	36.549	55.063	47.776	32.333	25.503	22.481	18.849	03:00	60.237	11:10	25.013	15.122	16.623	25.431	36.161	34.621	28.322	23.633	20.194
	SA02	24.177	17.757	18.09	22.321	27.493	29.589	29.073	26.381	22.715	17.213	03:40	29.832	14:30	26.431	20.321	19.464	23.634	34.903	34.81	29.184	25.934	23.198	19.069	03:50	38.035	12:10	31.807	19.911	21.652	34.521	52.288	45.603	31.899	25.837	22.743	19.008	03:00	56.88	11:10	24.741	15.218	16.52	24.659	35.046	33.952	28.331	23.89	20.315
	SA03	24.078	17.716	18.034	22.209	27.357	29.419	28.933	26.289	22.666	17.231	03:40	29.639	14:40	26.009	20.155	19.311	23.29	33.966	33.983	28.772	25.63	22.966	18.926	03:50	37.047	12:20	32.304	19.917	21.94	35.555	53.686	46.702	32.164	25.757	22.71	19.019	03:00	58.493	11:10	24.881	15.155	16.649	24.943	35.654	34.27	28.282	23.792	20.307
	SA04	24.028	17.658	17.951	22.174	27.263	29.43	28.911	26.23	22.605	17.139	03:40	29.685	14:40	25.784	19.93	19.088	23.112	33.658	33.737	28.589	25.42	22.74	18.7	03:50	36.661	12:20	32.575	20.186	22.161	35.783	54.03	47.105	32.441	25.949	22.94	19.271	03:00	58.901	11:10	24.935	15.237	16.631	24.97	35.576	34.498	28.394	23.822	20.356
	SA05	24.166	17.833	18.148	22.283	27.383	29.506	29.011	26.4	22.767	17.364	03:40	29.725	14:30	26.382	20.554	19.689	23.581	34.342	34.415	29.126	25.994	23.353	19.318	03:50	37.408	12:20	31.659	19.28	21.371	34.947	52.867	45.83	31.542	25.288	22.148	18.429	03:00	57.684	11:10	24.681	15.056	16.493	24.762	35.157	33.988	28.137	23.711	20.146
	SA06	24.09	17.774	18.069	22.241	27.369	29.447	28.913	26.257	22.65	17.223	03:40	29.684	14:30	25.893	20.105	19.265	23.203	33.689	33.734	28.655	25.566	22.924	18.877	03:50	36.635	12:00	32.063	19.678	21.704	35.248	53.422	46.414	31.926	25.591	22.517	18.774	03:00	58.266	11:10	24.768	15.146	16.536	24.705	35.442	34.197	28.198	23.725	20.193
	SA07	24.059	17.642	17.944	22.122	27.281	29.476	28.988	26.335	22.68	17.128	03:30	29.722	14:40	26.21	20.306	19.428	23.431	34.252	34.359	29.006	25.786	23.108	19.049	04:00	37.442	12:20	32.491	20.065	22.096	35.783	53.91	47.017	32.398	25.852	22.808	19.172	03:00	58.744	11:10	24.932	15.185	16.605	25	35.522	34.495	28.455	23.872	20.323
	SA08	24.088	17.729	18.017	22.236	27.346	29.476	28.942	26.292	22.665	17.207	03:30	29.692	14:40	26.039	20.198	19.341	23.314	33.952	34.024	28.815	25.664	23.004	18.963	03:40	36.992	12:20	32.243	19.841	21.871	35.492	53.634	46.68	32.108	25.691	22.63	18.939	03:00	58.461	11:10	24.86	15.178	16.595	24.895	35.52	34.38	28.293	23.771	20.249
	SA09	24.085	17.719	18.012	22.225	27.366	29.444	28.968	26.291	22.658	17.22	03:40	29.64	14:30	26.039	20.193	19.337	23.316	33.99	34.001	28.816	25.663	23	18.953	04:00	37.034	12:20	32.242	19.837	21.867	35.49	53.653	46.656	32.113	25.691	22.626	18.941	03:00	58.464	11:10	24.855	15.164	16.547	24.926	35.638	34.254	28.339	23.778	20.193
	SA10	24.086	17.726	18.01	22.243	27.347	29.458	28.948	26.291	22.663	17.226	03:30	29.763	14:40	26.036	20.196	19.335	23.317	33.965	34.014	28.804	25.657	23.001	18.957	04:00	37.047	12:20	32.224	19.838	21.855	35.463	53.62	46.627	32.078	25.682	22.627	18.943	03:00	58.476	11:10	24.867	15.186	16.528	25.057	35.541	34.296	28.299	23.765	20.265
	SA11	24.081	17.725	18.026	22.191	27.337	29.46	28.948	26.297	22.665	17.203	03:30	29.685	14:40	26.038	20.195	19.343	23.311	33.95	34.018	28.817	25.665	23.005	18.957	03:50	37	12:20	32.264	19.837	21.885	35.523	53.664	46.744	32.143	25.686	22.626	18.945	03:00	58.519	11:10	24.854	15.18	16.596	24.822	35.562	34.346	28.283	23.78	20.268
	SA12	24.061	17.771	18.066	22.15	27.226	29.389	28.908	26.293	22.689	17.27	03:30	29.675	14:40	25.868	20.281	19.402	23.102	33.34	33.623	28.611	25.574	23.011	19.058	04:00	36.398	12:00	32.167	19.935	21.941	35.361	53.343	46.446	31.973	25.661	22.674	19.065	03:00	58.185	11:10	24.782	15.197	16.625	24.759	35.29	34.144	28.232	23.761	20.249
	SA13	24.085	17.623	17.952	22.275	27.418	29.515	29	26.285	22.613	17.11	03:40	29.73	13:40	26.194	20.031	19.224	23.552	34.624	34.415	29.026	25.731	22.95	18.785	03:50	37.601	12:20	32.309	19.675	21.748	35.642	53.946	46.925	32.278	25.707	22.55	18.746	03:00	58.81	11:10	24.893	15.04	16.54	25.011	35.686	34.439	28.408	23.785	20.232
	SA14	24.096	17.82	18.109	22.199	27.258	29.402	28.94	26.317	22.72	17.344	03:30	29.593	14:30	25.966	20.407	19.515	23.205	33.426	33.692	28.708	25.663	23.108	19.183	04:00	36.44	12:20	32.246	20.042	22.045	35.462	53.422	46.493	32.043	25.719	22.739	19.169	03:00	58.278	11:10	24.864	15.278	16.681	24.952	35.39	34.22	28.296	23.783	20.315
	SA15	24.062	17.584	17.904	22.257	27.431	29.495	28.977	26.263	22.588	17.035	03:30	29.816	14:30	26.102	19.91	19.11	23.461	34.584	34.335	28.926	25.639	22.854	18.665	03:40	37.598	12:20	32.227	19.565	21.638	35.543	53.893	46.863	32.185	25.645	22.484	18.643	03:00	58.759	11:10	24.859	15.007	16.469	24.93	35.759	34.393	28.357	23.746	20.214
	SA16	24.046	17.683	18.006	22.214	27.305	29.413	28.922	26.213	22.613	17.192	03:40	29.58	13:10	25.998	20.171	19.32	23.303	33.923	33.959	28.767	25.597	22.946	18.938	03:40	36.993	12:20	32.15	19.757	21.837	35.47	53.57	46.558	31.96	25.534	22.513	18.886	03:00	58.413	11:10	24.803	15.112	16.581	24.898	35.483	34.214	28.274	23.655	20.206
	SA17	24.109	17.757	18.025	22.218	27.365	29.437	29.005	26.356	22.708	17.221	03:40	29.667	14:40	26.059	20.213	19.349	23.324	33.972	34.005	28.847	25.714	23.051	18.971	03:40	37.088	12:20	32.326	19.919	21.895	35.514	53.696	46.734	32.262	25.843	22.745	18.997	03:00	58.552	11:10	24.907	15.197	16.592	24.916	35.638	34.298	28.42	23.879	20.313
	SA18	24.061	17.719	18.004	22.213	27.299	29.407	28.915	26.277	22.657	17.207	03:40	29.598	14:10	25.988	20.192	19.329	23.278	33.839	33.891	28.751	25.63	22.991	18.951	04:00	36.868	12:20	32.108	19.835	21.824	35.283	53.261	46.334	32.035	25.668	22.625	18.936	03:00	58.071	11:10	24.857	15.205	16.613	24.894	35.532	34.192	28.306	23.8	20.314
	SA19	24.11	17.712	18.033	22.236	27.402	29.515	29.008	26.311	22.667	17.21	03:30	29.748	14:30	26.104	20.19	19.345	23.368	34.116	34.185	28.909	25.705	23.016	18.953	04:00	37.19	12:20	32.426	19.826	21.924	35.778	54.156	47.156	32.237	25.709	22.625	18.93	03:00	59.051	11:10	24.886	15.094	16.484	25.016	35.739	34.534	28.345	23.747	20.131
	SA20	24.075	17.716	18.007	22.209	27.311	29.443	28.965	26.292	22.66	17.192	03:30	29.604	14:40	26.027	20.191	19.33	23.309	33.925	33.994	28.811	25.659	22.998	18.95	03:40	37.004	12:20	32.236	19.833	21.861	35.484	53.623	46.667	32.12	25.683	22.622	18.929	03:00	58.46	11:10	24.827	15.148	16.52	24.901	35.449	34.293	28.339	23.764	20.206
	SA21	24.083	17.729	18.02	22.235	27.326	29.42	28.973	26.293	22.669	17.206	03:40	29.642	14:40	26.034	20.195	19.341	23.317	33.953	33.986	28.816	25.659	23.002	18.962	03:50	36.959	12:20	32.243	19.837	21.873	35.498	53.638	46.665	32.122	25.686	22.629	18.951	03:00	58.471	11:10	24.857	15.167	16.584	24.85	35.564	34.261	28.36	23.791	20.274
	SB01	24.092	17.886	18.161	22.144	27.267	29.328	28.876	26.321	22.753	17.418	03:40	29.638	13:40	25.797	20.307	19.44	22.912	33.405	33.184	28.5	25.58	23.045	19.103	03:40	36.714	11:40	31.798	20.307	21.976	33.707	52.992	44.674	31.713	25.971	23.047	19.401	03:00	58.518	11:10	24.685	15.36	16.694	24.093	35.412	33.448	28.164	23.897	20.413
	SB02	24.089	17.576	17.918	22.27	27.417	29.6	29.064	26.275	22.592	17.068	03:30	29.829	14:40	26.334	20.111	19.267	23.906	34.573	34.882	29.182	25.765	22.983	18.851	03:40	37.41	12:10	32.682	19.343	21.807	37.569	54.272	48.322	32.593	25.378	22.173	18.431	03:00	58.497	11:10	25.203	14.98	16.666	26.077	36.162	35.248	28.64	23.721	20.129
	SB03	24.133	17.73	18.031	22.288	27.423	29.541	29.024	26.342	22.689	17.173	03:40	29.775	14:30	27.071	20.549	19.716	24.378	36.169	36.173	29.879	26.284	23.419	19.273	03:40	39.588	11:30	31.886	20.043	21.857	34.612	51.887	45.689	32.219	25.937	22.842	19.123	03:00	55.701	11:10	24.718	15.229	16.572	24.602	34.796	33.969	28.392	23.898	20.285
	SB04	24.083	17.707	18.008	22.215	27.337	29.472	28.96	26.296	22.667	17.175	03:30	29.696	14:40	26.438	20.407	19.534	23.712	34.764	34.808	29.212	25.893	23.171	19.149	03:50	37.908	12:20	32.145	19.902	21.87	35.262	53.129	46.4	32.167	25.751	22.679	19.002	03:00	57.666	11:10	24.822	15.167	16.556	24.908	35.314	34.199	28.358	23.814	20.259
	SB05	24.134	17.768	18.064	22.273	27.408	29.511	29.024	26.328	22.698	17.258	03:30	29.767	14:30	26.778	20.548	19.716	24.088	35.338	35.334	29.58	26.188	23.429	19.295	03:50	38.527	11:30	31.778	19.685	21.655	34.777	52.163	45.69	32.015	25.683	22.553	18.801	03:00	56.166	11:10	24.688	15.132	16.538	24.615	34.868	33.926	28.357	23.813	20.26
	SB06	24.05	17.715	17.997	22.187	27.309	29.386	28.915	26.257	22.633	17.172	03:40	29.632	14:40	26.002	20.187	19.324	23.283	33.907	33.949	28.763	25.628	22.975	18.94	03:50	36.928	12:00	32.252	19.826	21.866	35.553	53.694	46.709	32.109	25.656	22.6	18.927	03:00	58.558	11:10	24.837	15.168	16.507	25.002	35.546	34.227	28.272	23.744	20.231
	SB07	23.972	17.632	17.955	22.136	27.163	29.263	28.838	26.202	22.583	17.152	03:40	29.514	14:40	25.017	19.23	18.771	23.083	33.019	32.152	27.437	24.499	21.946	18.238	03:30	35.349	12:00	31.869	19.551	21.702	35.313	53.207	45.923	31.631	25.318	22.309	18.712	03:00	57.913	11:10	24.677	15.044	16.504	24.793	35.294	33.959	28.067	23.6	20.152
	SB09	23.612	17.394	17.758	21.908	26.614	28.784	28.432	25.764	22.243	16.925	03:30	29.129	14:40	20.801	17.262	17.048	20.04	25.179	24.733	22.342	20.708	19.094	16.646	03:30	26.399	11:30	29.936	18.667	20.888	33.847	49.516	42.628	29.346	23.59	21.003	17.969	03:00	53.916	11:10	23.734	14.705	16.215	24.138	33.296	32.231	26.985	22.785	19.514
	SB10	24.186	17.698	18.025	22.264	27.368	29.593	29.276	26.524	22.738	17.199	03:30	29.889	14:20	27.196	20.532	19.71	24.826	36.787	36.273	30.043	26.242	23.151	19.147	03:40	39.991	12:00	36.566	19.999	23.573	43.546	65.844	56.361	34.636	26.005	22.56	18.969	03:00	72.03	11:10	25.369	14.075	15.947	26.477	38.474	36.858	28.677	23.087	19.36
	SB11	24.115	17.59	17.941	22.22	27.307	29.551	29.208	26.446	22.657	17.087	03:30	29.857	13:40	27.143	20.455	19.652	24.758	36.756	36.266	29.996	26.173	23.084	19.084	03:40	39.987	12:10	36.493	19.921	23.51	43.45	65.76	56.299	34.576	25.934	22.493	18.89	03:00	71.928	11:10	25.291	13.947	15.859	26.294	38.423	36.894	28.577	23.042	19.295
	SB12	23.972	17.72	18.021	22.178	27.174	29.298	28.747	26.035	22.6	17.23	03:30	29.474	14:40	25.968	20.176	19.264	22.992	34.001	34.237	28.657	25.498	22.916	18.961	04:00	37.259	12:00	31.961	19.839	21.253	34.257	53.718	47.151	31.334	25.543	22.592	18.969	03:00	59.084	11:10	24.842	15.334	16.569	24.616	35.701	34.72	27.962	23.615	20.221
	SB13	24.027	17.696	18	22.184	27.258	29.372	28.865	26.217	22.625	17.158	03:40	29.679	14:40	25.92	20.165	19.276	23.081	33.866	33.895	28.585	25.552	22.941	18.928	03:50	36.902	12:20	31.924	19.817	21.513	34.756	53.366	46.283	31.441	25.618	22.599	18.933	03:00	58.278	11:10	24.749	15.227	16.564	24.612	35.383	34.158	28.069	23.766	20.209
	SB14	24.015	17.711	17.999	22.182	27.283	29.344	28.821	26.17	22.611	17.183	03:30	29.549	14:40	25.865	20.158	19.26	22.951	33.843	33.863	28.449	25.489	22.907	18.931	04:00	36.923	12:20	31.747	19.819	21.372	34.295	53.235	46.053	31.05	25.574	22.582	18.934	03:00	58.181	11:10	24.693	15.277	16.545	24.411	35.432	34.039	27.876	23.716	20.245
	SB15	23.876	17.669	17.946	22.06	27.004	29.081	28.63	26.053	22.569	17.155	03:40	29.274	14:20	24.373	19.459	18.64	21.377	30.11	31.057	26.995	24.756	22.589	18.42	04:10	32.921	12:20	28.534	19.542	20.234	29.281	43.183	39.379	28.879	25.211	22.565	18.773	03:10	48.615	11:10	23.581	15.296	16.279	22.59	31.591	31.545	27.132	23.761	20.453
	SB16	24.115	17.737	18.049	22.251	27.368	29.513	28.994	26.332	22.676	17.235	03:30	29.756	14:30	26.382	20.408	19.529	23.677	34.676	34.685	29.162	25.836	23.083	19.11	03:50	38.009	12:20	33.171	19.917	22.238	36.864	56.288	48.926	32.732	25.779	22.624	18.971	03:00	61.461	11:10	25.143	15.138	16.698	25.179	36.441	35.264	28.478	23.756	20.189
	SB17	24.158	17.728	18.055	22.34	27.406	29.544	29.078	26.401	22.711	17.214	03:40	29.762	13:50	26.074	20.191	19.343	23.354	33.978	34.078	28.878	25.729	23.045	18.95	03:50	37.094	12:20	32.271	19.83	21.862	35.513	53.653	46.755	32.163	25.736	22.654	18.938	03:00	58.503	11:10	24.909	15.152	16.622	24.983	35.541	34.44	28.41	23.849	20.277
[truncated: 17 more columns]

## Sheet: abs_Streets
		theta													t_surf													MRT													PET
		AVG	00-03	03-06	06-09	9-12	12-15	15-18	18-21	21-24	MIN	TIME	MAX	TIME	AVG	00-03	03-06	06-09	9-12	12-15	15-18	18-21	21-24	MIN	TIME	MAX	TIME	AVG	00-03	03-06	06-09	9-12	12-15	15-18	18-21	21-24	MIN	TIME	MAX	TIME	AVG	00-03	03-06	06-09	9-12	12-15	15-18	18-21	21-24
	base	24.229	17.697	18.007	22.366	27.437	29.792	29.356	26.451	22.729	17.164	03:40	30.153	14:40	28.991	20.875	20.285	28.633	37.84	39.236	33.731	27.391	23.933	19.434	04:00	40.651	12:20	36.153	20.189	24.549	44.644	56.177	54.011	39.965	26.637	23.055	19.193	03:00	58.646	11:10	26.66	15.102	17.326	28.833	37.121	38.053	32.098	24.434	20.314
	SA01	24.129	17.658	17.928	22.253	27.311	29.638	29.225	26.351	22.664	17.103	03:40	29.883	14:40	28.618	20.759	20.164	28.236	37.12	38.517	33.278	27.126	23.745	19.328	03:40	39.793	12:30	36.639	20.118	24.827	45.703	57.591	55.145	40.304	26.487	22.933	19.109	03:00	60.194	11:10	26.842	15.073	17.416	29.363	37.722	38.453	32.115	24.305	20.292
	SA02	24.31	17.728	18.074	22.481	27.558	29.878	29.458	26.529	22.777	17.185	03:40	30.299	14:30	29.297	20.974	20.377	29.013	38.489	39.77	34.079	27.593	24.077	19.507	03:50	41.25	12:20	35.684	20.253	24.286	43.677	54.848	52.883	39.623	26.755	23.148	19.248	03:10	57.215	11:10	26.473	15.151	17.238	28.597	36.445	37.488	32.028	24.502	20.339
	SA03	24.225	17.699	18.028	22.355	27.458	29.742	29.325	26.453	22.738	17.192	03:30	30.096	14:40	29.048	20.928	20.339	28.711	37.923	39.27	33.78	27.447	23.987	19.483	03:50	40.795	12:20	36.109	20.19	24.544	44.599	56.1	53.89	39.88	26.616	23.05	19.193	03:00	58.531	11:10	26.623	15.092	17.386	28.848	37.069	37.878	31.984	24.403	20.323
	SA04	24.165	17.629	17.937	22.313	27.348	29.735	29.304	26.386	22.668	17.088	03:40	30.085	14:40	28.726	20.649	20.063	28.401	37.504	38.914	33.452	27.14	23.687	19.213	04:00	40.27	12:20	36.479	20.501	24.819	44.959	56.559	54.431	40.317	26.903	23.345	19.486	03:00	59.022	11:10	26.708	15.149	17.29	28.921	37.044	38.197	32.158	24.49	20.415
	SA05	24.325	17.822	18.143	22.446	27.5	29.839	29.424	26.575	22.852	17.333	03:40	30.174	14:30	29.594	21.409	20.774	29.194	38.528	39.932	34.416	27.993	24.506	19.941	04:00	41.374	12:20	35.266	19.443	23.858	43.764	55.051	52.765	38.964	25.947	22.339	18.486	03:00	57.488	11:10	26.343	14.989	17.108	28.525	36.617	37.464	31.735	24.219	20.081
	SA06	24.234	17.742	18.057	22.389	27.457	29.769	29.319	26.418	22.72	17.208	03:40	30.083	14:30	28.747	20.746	20.17	28.398	37.437	38.772	33.426	27.22	23.803	19.32	03:40	40.149	12:20	35.936	20.023	24.367	44.402	55.879	53.667	39.73	26.498	22.925	19.011	03:00	58.333	11:10	26.536	15.058	17.259	28.637	36.908	37.835	31.959	24.369	20.267
	SA07	24.194	17.616	17.935	22.269	27.361	29.778	29.362	26.487	22.748	17.096	03:40	30.131	14:40	29.259	21.039	20.405	28.896	38.258	39.697	34.076	27.602	24.101	19.545	04:00	41.144	12:20	36.384	20.405	24.724	44.885	56.411	54.29	40.264	26.843	23.253	19.397	03:00	58.886	11:10	26.716	15.111	17.316	28.962	37.057	38.118	32.235	24.531	20.401
	SA08	24.231	17.701	18	22.376	27.442	29.804	29.338	26.452	22.73	17.163	03:40	30.178	14:40	28.99	20.875	20.277	28.63	37.846	39.234	33.735	27.393	23.933	19.429	04:00	40.604	12:20	36.153	20.19	24.543	44.643	56.178	54.008	39.964	26.642	23.055	19.193	03:00	58.644	11:10	26.627	15.1	17.249	28.773	37.065	38.052	32.07	24.425	20.28
	SA09	24.223	17.692	18.001	22.356	27.449	29.748	29.357	26.451	22.725	17.195	03:30	30.084	14:30	28.981	20.869	20.281	28.637	37.839	39.176	33.727	27.393	23.925	19.422	04:00	40.697	12:20	36.146	20.186	24.545	44.643	56.175	53.971	39.959	26.64	23.049	19.179	03:00	58.623	11:10	26.62	15.077	17.286	28.868	37.046	37.889	32.114	24.435	20.242
	SA10	24.228	17.697	17.999	22.384	27.448	29.778	29.339	26.449	22.73	17.202	03:30	30.243	14:40	28.986	20.877	20.282	28.63	37.857	39.208	33.715	27.385	23.933	19.437	04:00	40.662	12:20	36.135	20.191	24.539	44.618	56.153	53.955	39.934	26.633	23.054	19.189	03:00	58.641	11:10	26.639	15.102	17.288	28.827	37.132	37.974	32.05	24.412	20.326
	SA11	24.222	17.695	18.014	22.345	27.427	29.774	29.333	26.456	22.73	17.161	03:40	30.119	14:40	28.989	20.867	20.286	28.644	37.823	39.235	33.724	27.396	23.934	19.431	03:50	40.687	12:20	36.167	20.183	24.56	44.676	56.201	54.05	39.978	26.638	23.052	19.185	03:00	58.675	11:10	26.642	15.081	17.321	28.832	37.052	38.044	32.061	24.429	20.32
	SA12	24.202	17.741	18.036	22.284	27.317	29.711	29.309	26.46	22.76	17.25	03:40	30.131	14:40	28.836	21.037	20.37	28.291	37.228	38.779	33.54	27.408	24.035	19.59	04:00	40.142	12:30	36.076	20.315	24.621	44.477	55.847	53.733	39.832	26.647	23.135	19.337	03:00	58.31	11:10	26.567	15.139	17.28	28.677	36.796	37.848	32.024	24.434	20.339
	SA13	24.221	17.593	17.934	22.43	27.499	29.816	29.386	26.436	22.676	17.058	03:40	30.181	14:40	29.119	20.614	20.129	29.046	38.483	39.664	33.917	27.332	23.765	19.175	03:50	41.217	12:20	36.21	19.985	24.407	44.846	56.521	54.281	40.106	26.605	22.927	18.961	03:00	59.01	11:10	26.669	14.931	17.238	29.011	37.233	38.116	32.178	24.406	20.243
	SA14	24.237	17.791	18.088	22.345	27.356	29.712	29.329	26.481	22.791	17.294	03:40	30.018	14:30	28.919	21.155	20.481	28.386	37.315	38.818	33.591	27.486	24.118	19.706	04:00	40.151	12:20	36.156	20.431	24.74	44.575	55.936	53.776	39.877	26.707	23.206	19.441	03:00	58.401	11:10	26.622	15.19	17.411	28.834	36.88	37.835	32.008	24.44	20.38
	SA15	24.205	17.558	17.895	22.419	27.525	29.818	29.362	26.415	22.652	17.006	03:30	30.275	14:30	29.043	20.507	20.031	28.974	38.448	39.606	33.849	27.247	23.684	19.079	03:40	41.207	12:20	36.129	19.869	24.289	44.758	56.462	54.219	40.042	26.539	22.856	18.852	03:00	58.964	11:10	26.647	14.948	17.211	28.944	37.256	38.069	32.142	24.37	20.24
	SA16	24.19	17.658	17.983	22.371	27.401	29.718	29.323	26.38	22.682	17.145	03:40	30	14:40	28.95	20.849	20.254	28.649	37.81	39.145	33.682	27.332	23.879	19.405	04:00	40.648	12:20	36.055	20.104	24.503	44.633	56.105	53.863	39.812	26.48	22.938	19.131	03:00	58.565	11:10	26.578	15.039	17.24	28.908	36.982	37.85	32.023	24.306	20.28
	SA17	24.247	17.728	18.006	22.35	27.456	29.754	29.392	26.512	22.776	17.152	03:40	30.088	14:40	29.006	20.892	20.289	28.639	37.838	39.201	33.767	27.442	23.98	19.44	03:50	40.661	12:20	36.235	20.272	24.574	44.666	56.227	54.069	40.108	26.793	23.17	19.252	03:00	58.726	11:10	26.668	15.121	17.278	28.808	37.123	37.964	32.166	24.515	20.368
	SA18	24.211	17.687	17.991	22.376	27.39	29.744	29.332	26.444	22.728	17.184	03:40	30.084	14:40	28.955	20.864	20.265	28.624	37.732	39.146	33.712	27.376	23.925	19.423	04:00	40.509	12:30	36.066	20.182	24.508	44.516	55.947	53.797	39.903	26.625	23.052	19.173	03:00	58.389	11:10	26.625	15.087	17.286	28.876	36.949	37.959	32.127	24.421	20.294
	SA19	24.244	17.695	18.025	22.373	27.466	29.811	29.382	26.463	22.733	17.184	03:40	30.153	14:30	29.034	20.886	20.301	28.69	37.922	39.313	33.798	27.418	23.943	19.443	03:40	40.69	12:20	36.265	20.192	24.599	44.84	56.452	54.264	40.065	26.654	23.054	19.192	03:00	58.917	11:10	26.675	15.093	17.305	28.93	37.131	38.139	32.135	24.405	20.26
	SA20	24.219	17.689	18.002	22.356	27.414	29.762	29.357	26.449	22.726	17.185	03:40	30.026	14:40	28.965	20.866	20.268	28.629	37.8	39.174	33.696	27.371	23.916	19.426	04:00	40.619	12:20	36.139	20.183	24.538	44.641	56.158	53.975	39.949	26.626	23.044	19.178	03:00	58.596	11:10	26.635	15.082	17.274	28.882	37.059	38.009	32.084	24.416	20.276
	SA21	24.226	17.705	18.005	22.386	27.415	29.743	29.368	26.453	22.736	17.177	03:30	30.085	14:40	29.022	20.892	20.299	28.682	37.893	39.259	33.784	27.415	23.953	19.441	03:50	40.66	12:20	36.167	20.198	24.558	44.669	56.198	54.012	39.988	26.649	23.065	19.196	03:10	58.649	11:10	26.644	15.132	17.291	28.828	37.044	37.962	32.138	24.422	20.335
	SB01	24.256	17.884	18.156	22.362	27.37	29.675	29.301	26.48	22.818	17.388	03:40	30.038	14:30	28.854	21.095	20.384	28.389	37.241	38.674	33.575	27.417	24.054	19.67	03:40	40.094	12:20	35.844	20.746	24.293	43.59	55.282	52.79	39.523	26.997	23.529	19.722	03:00	57.838	11:10	26.747	15.553	17.385	28.749	37.059	37.859	32.145	24.679	20.547
	SB02	24.211	17.562	17.895	22.363	27.474	29.866	29.44	26.431	22.66	17.044	03:40	30.144	14:40	29.186	20.731	20.264	29.029	38.401	39.793	34.02	27.407	23.843	19.283	03:40	41.1	12:20	36.49	19.666	24.892	45.867	56.993	55.051	40.611	26.273	22.565	18.645	03:00	59.177	11:10	26.725	14.843	17.432	29.269	37.287	38.331	32.318	24.204	20.118
	SB03	24.253	17.704	18.01	22.415	27.481	29.81	29.378	26.48	22.744	17.181	03:40	30.147	14:40	29.445	21.04	20.452	29.122	38.817	40.152	34.191	27.665	24.116	19.575	03:50	41.771	12:20	35.986	20.289	24.54	44.245	55.39	53.53	39.989	26.752	23.152	19.277	03:00	57.405	11:10	26.579	15.156	17.303	28.712	36.751	37.819	32.1	24.475	20.318
	SB04	24.179	17.677	17.972	22.297	27.354	29.7	29.291	26.428	22.715	17.164	03:30	30.041	14:40	28.39	20.817	20.1	27.732	36.74	38.082	32.852	27.055	23.744	19.368	03:50	39.529	12:20	36.517	20.086	24.702	45.613	57.153	54.922	40.308	26.452	22.901	19.099	03:00	59.511	11:10	26.805	15.063	17.316	29.411	37.502	38.35	32.231	24.328	20.242
	SB05	24.259	17.746	18.045	22.424	27.454	29.784	29.387	26.473	22.759	17.221	03:40	30.196	14:30	28.925	21.015	20.391	28.423	37.543	38.845	33.528	27.525	24.128	19.57	03:50	40.238	12:20	35.76	19.758	24.269	44.454	55.642	53.532	39.583	26.209	22.636	18.795	03:00	57.735	11:10	26.527	15.018	17.245	28.894	36.805	37.763	32.018	24.285	20.188
	SB06	24.138	17.671	17.966	22.265	27.301	29.602	29.228	26.388	22.681	17.138	03:40	29.992	14:40	27.632	20.476	19.756	26.815	35.407	36.723	31.904	26.571	23.406	19.079	03:50	38.013	12:30	36.75	19.964	24.771	46.237	57.966	55.555	40.429	26.297	22.779	18.975	03:00	60.483	11:10	26.893	14.992	17.378	29.644	37.87	38.583	32.233	24.244	20.198
	SB07	24.141	17.622	17.973	22.289	27.305	29.627	29.258	26.383	22.674	17.125	03:40	30.016	14:40	28.215	20.192	19.913	28.362	36.988	37.934	32.628	26.516	23.188	18.929	03:40	39.521	12:20	35.879	19.948	24.432	44.553	55.891	53.542	39.567	26.312	22.788	18.989	03:00	58.242	11:10	26.521	15.01	17.346	28.801	36.874	37.736	31.874	24.258	20.269
	SB09	23.794	17.378	17.752	22.028	26.802	29.147	28.862	26.006	22.375	16.902	03:40	29.486	14:50	24.377	18.175	18.352	25.349	30.627	31.529	27.582	22.916	20.482	17.358	03:30	32.158	12:20	34.204	19.037	23.705	43.254	53.134	50.886	37.42	24.661	21.539	18.222	03:00	55.358	11:10	25.682	14.646	16.998	28.183	35.38	36.333	30.756	23.482	19.675
	SB10	24.311	17.726	18.044	22.415	27.47	29.856	29.554	26.623	22.798	17.217	03:40	30.173	14:30	29.947	21.351	20.724	29.847	39.746	40.925	34.827	27.954	24.203	19.782	03:40	42.47	12:30	38.883	20.461	25.897	49.722	62.99	59.771	42.122	26.985	23.119	19.35	03:00	65.942	11:10	27.386	14.985	17.549	30.402	39.024	39.985	32.893	24.277	19.971
	SB11	24.227	17.609	17.958	22.347	27.403	29.794	29.471	26.528	22.706	17.079	03:30	30.08	14:30	29.736	21.065	20.588	29.752	39.604	40.732	34.551	27.659	23.937	19.556	03:40	42.37	12:20	38.629	20.285	25.735	49.401	62.599	59.399	41.864	26.799	22.954	19.196	03:00	65.539	11:10	27.231	14.837	17.476	30.003	38.828	39.882	32.767	24.152	19.903
	SB12	23.909	17.635	17.939	22.083	26.953	29.257	28.772	26.036	22.597	17.143	03:30	29.526	14:40	25.777	19.99	19.193	23.637	32.113	33.331	29.226	25.655	23.072	18.876	04:00	35.022	12:20	30.346	19.803	20.989	32.858	45.957	42.768	32.026	25.643	22.722	18.982	03:10	49.436	11:10	24.572	15.682	16.836	24.212	32.926	33.412	28.761	24.066	20.679
	SB13	24.087	17.655	17.972	22.232	27.223	29.532	29.103	26.314	22.665	17.157	03:40	29.983	14:40	27.224	20.491	19.672	25.772	34.666	35.868	31.24	26.537	23.543	19.208	04:00	37.463	12:20	32.853	20.012	22.087	38.142	50.602	47.718	35.174	26.174	22.92	19.086	03:00	53.426	11:10	25.484	15.524	16.9	26.188	34.805	35.487	30.196	24.293	20.48
	SB14	23.976	17.637	17.938	22.106	27.084	29.339	28.885	26.202	22.62	17.154	03:40	29.6	14:40	25.93	20.083	19.245	23.599	32.742	33.687	29.183	25.765	23.137	18.939	04:10	35.616	12:20	30.562	19.825	20.977	33.088	47.211	43.159	31.755	25.741	22.738	18.957	03:10	50.423	11:10	24.543	15.564	16.696	24.105	33.342	33.385	28.543	24.09	20.618
	SB15	23.916	17.644	17.927	22.05	26.958	29.231	28.786	26.133	22.602	17.142	03:40	29.488	14:20	25.293	19.79	18.987	22.924	31.15	32.493	28.56	25.439	22.999	18.727	04:10	33.884	12:20	29.171	19.716	20.486	30.906	42.88	40.267	30.802	25.577	22.735	18.904	03:10	46.31	11:10	24.136	15.691	16.693	23.341	31.746	32.361	28.287	24.185	20.782
	SB16	24.242	17.706	18.03	22.373	27.456	29.783	29.369	26.479	22.739	17.189	03:30	30.173	14:30	29.23	21.036	20.41	28.924	38.312	39.637	34.003	27.523	23.997	19.536	04:00	41.186	12:20	36.725	20.262	24.765	45.583	57.655	55.333	40.426	26.717	23.058	19.208	03:00	60.211	11:10	26.849	15.174	17.444	29.05	37.583	38.537	32.295	24.437	20.275
	SB17	24.299	17.703	18.046	22.479	27.49	29.859	29.471	26.564	22.783	17.17	03:40	30.191	14:40	29.02	20.87	20.284	28.693	37.851	39.247	33.789	27.455	23.972	19.42	03:40	40.754	12:20	36.172	20.183	24.531	44.678	56.182	54.029	40.007	26.685	23.079	19.176	03:10	58.66	11:10	26.686	15.088	17.321	28.954	37.046	38.044	32.188	24.504	20.341
[truncated: 17 more columns]

## Sheet: abs_Courtyards
		theta													t_surf													MRT													PET
		AVG	00-03	03-06	06-09	9-12	12-15	15-18	18-21	21-24	MIN	TIME	MAX	TIME	AVG	00-03	03-06	06-09	9-12	12-15	15-18	18-21	21-24	MIN	TIME	MAX	TIME	AVG	00-03	03-06	06-09	9-12	12-15	15-18	18-21	21-24	MIN	TIME	MAX	TIME	AVG	00-03	03-06	06-09	9-12	12-15	15-18	18-21	21-24
	base	24.089	17.786	18.069	22.122	27.015	29.467	29.136	26.382	22.739	17.297	03:30	29.778	14:40	26.174	20.273	19.605	24.863	32.576	33.952	29.635	25.621	22.865	19.111	04:00	35.033	12:20	33.601	20.539	23.178	39.393	51.685	48.942	35.719	26.216	23.133	19.647	03:00	54.176	11:10	26.762	16.452	18.192	28.269	36.887	37.234	30.969	24.846	21.246
	SA01	23.976	17.748	17.976	21.984	26.869	29.304	28.993	26.269	22.669	17.232	03:40	29.578	14:50	25.749	20.136	19.465	24.46	31.727	33.125	29.134	25.305	22.64	18.983	03:40	34.036	12:20	34.168	20.453	23.486	40.665	53.355	50.241	36.129	26.031	22.984	19.56	03:00	55.906	11:10	27.01	16.418	18.265	28.925	37.724	37.777	31.109	24.716	21.143
	SA02	24.188	17.82	18.136	22.236	27.18	29.619	29.256	26.464	22.798	17.338	03:40	29.985	14:30	26.553	20.391	19.713	25.22	33.384	34.704	30.068	25.887	23.058	19.219	03:50	35.946	12:20	33.088	20.612	22.898	38.254	50.184	47.764	35.364	26.37	23.256	19.711	03:10	52.643	11:10	26.534	16.49	18.055	27.75	36.182	36.683	30.874	24.954	21.286
	SA03	24.091	17.787	18.08	22.109	27.037	29.451	29.134	26.385	22.748	17.313	03:30	29.795	14:40	26.245	20.345	19.674	24.927	32.653	34.023	29.705	25.692	22.941	19.183	04:00	35.144	12:20	33.55	20.496	23.141	39.351	51.614	48.853	35.662	26.183	23.099	19.603	03:00	54.066	11:10	26.72	16.418	18.177	28.255	36.835	37.121	30.913	24.823	21.219
	SA04	24.041	17.723	18.007	22.092	26.959	29.446	29.104	26.322	22.68	17.228	03:40	29.77	14:40	26.06	20.174	19.504	24.781	32.439	33.822	29.512	25.503	22.746	19.008	04:00	34.931	12:20	33.775	20.723	23.339	39.565	51.86	49.157	35.908	26.357	23.294	19.808	03:00	54.341	11:10	26.808	16.486	18.228	28.412	36.87	37.316	31.028	24.862	21.267
	SA05	24.176	17.898	18.198	22.176	27.071	29.519	29.198	26.493	22.854	17.437	03:20	29.816	14:40	26.558	20.631	19.957	25.184	32.975	34.394	30.035	26.022	23.267	19.475	03:40	35.525	12:20	32.99	19.917	22.63	38.818	51.016	48.171	35.056	25.73	22.583	19.063	03:00	53.476	11:10	26.52	16.285	18.026	28.006	36.549	36.858	30.698	24.698	21.036
	SA06	24.104	17.846	18.125	22.142	27.051	29.471	29.116	26.346	22.736	17.361	03:30	29.775	14:30	26.046	20.198	19.533	24.748	32.38	33.728	29.475	25.521	22.786	19.042	03:40	34.811	12:20	33.43	20.371	23.003	39.184	51.484	48.726	35.554	26.107	23.012	19.459	03:00	53.96	11:10	26.668	16.41	18.1	28.133	36.775	37.106	30.866	24.775	21.178
	SA07	24.055	17.683	17.976	22.03	26.97	29.463	29.158	26.417	22.746	17.206	03:40	29.796	14:40	26.351	20.389	19.709	25.015	32.84	34.254	29.84	25.77	22.995	19.222	03:50	35.367	12:20	33.876	20.815	23.449	39.686	51.991	49.261	36.003	26.433	23.372	19.932	03:00	54.482	11:10	26.863	16.513	18.235	28.38	37.001	37.392	31.113	24.956	21.315
	SA08	24.095	17.789	18.066	22.125	27.042	29.483	29.131	26.38	22.742	17.292	03:30	29.839	14:40	26.178	20.276	19.603	24.865	32.593	33.963	29.632	25.623	22.867	19.112	03:40	35.059	12:20	33.603	20.541	23.176	39.393	51.695	48.949	35.721	26.217	23.134	19.645	03:00	54.17	11:10	26.752	16.461	18.165	28.231	36.899	37.229	30.951	24.845	21.234
	SA09	24.09	17.784	18.061	22.117	27.035	29.46	29.146	26.382	22.739	17.303	03:30	29.773	14:40	26.175	20.273	19.601	24.866	32.58	33.951	29.637	25.622	22.865	19.114	04:00	35.068	12:20	33.601	20.539	23.174	39.395	51.687	48.937	35.724	26.217	23.131	19.637	03:00	54.149	11:10	26.752	16.435	18.14	28.31	36.91	37.183	30.968	24.837	21.229
	SA10	24.088	17.786	18.066	22.12	27.024	29.461	29.128	26.376	22.742	17.321	03:20	29.836	14:40	26.168	20.274	19.602	24.858	32.572	33.94	29.621	25.614	22.864	19.114	04:00	35.032	12:20	33.583	20.54	23.168	39.362	51.652	48.9	35.693	26.213	23.134	19.645	03:00	54.145	11:10	26.746	16.443	18.151	28.303	36.884	37.184	30.949	24.836	21.217
	SA11	24.093	17.787	18.077	22.109	27.04	29.467	29.137	26.383	22.741	17.303	03:40	29.812	14:40	26.179	20.274	19.609	24.865	32.593	33.958	29.64	25.625	22.868	19.117	03:40	35.068	12:20	33.619	20.539	23.189	39.426	51.731	48.979	35.741	26.217	23.133	19.644	03:00	54.21	11:10	26.744	16.431	18.19	28.213	36.881	37.201	30.962	24.842	21.235
	SA12	24.07	17.834	18.103	22.062	26.934	29.39	29.089	26.381	22.769	17.376	03:30	29.752	14:40	26.019	20.345	19.658	24.655	32.114	33.55	29.407	25.543	22.88	19.204	04:00	34.544	12:20	33.524	20.627	23.245	39.283	51.426	48.695	35.561	26.18	23.176	19.753	03:00	53.909	11:10	26.696	16.488	18.176	28.208	36.704	37.028	30.87	24.822	21.273
	SA13	24.091	17.698	17.999	22.164	27.087	29.526	29.185	26.38	22.689	17.201	03:30	29.859	14:40	26.321	20.143	19.5	25.101	33.086	34.381	29.87	25.68	22.809	18.958	03:40	35.594	12:20	33.67	20.391	23.052	39.524	51.967	49.223	35.907	26.24	23.054	19.459	03:00	54.481	11:10	26.779	16.334	18.088	28.403	37.001	37.333	31.076	24.842	21.155
	SA14	24.106	17.882	18.157	22.102	26.974	29.416	29.114	26.406	22.801	17.425	03:30	29.734	14:30	26.113	20.462	19.769	24.744	32.203	33.63	29.494	25.631	22.969	19.317	04:00	34.654	12:20	33.611	20.746	23.366	39.38	51.522	48.757	35.625	26.244	23.246	19.872	03:00	53.993	11:10	26.75	16.566	18.258	28.276	36.743	37.086	30.931	24.859	21.283
	SA15	24.06	17.645	17.945	22.135	27.075	29.511	29.154	26.352	22.666	17.142	03:30	29.896	14:40	26.229	20.018	19.383	25.011	33.026	34.311	29.779	25.586	22.719	18.836	03:40	35.525	12:20	33.577	20.258	22.921	39.415	51.886	49.156	35.828	26.171	22.979	19.33	03:00	54.4	11:10	26.729	16.285	18.038	28.293	36.981	37.291	31.014	24.806	21.12
	SA16	24.052	17.747	18.053	22.116	26.999	29.425	29.092	26.3	22.686	17.282	03:40	29.714	14:30	26.134	20.247	19.582	24.853	32.555	33.908	29.579	25.546	22.8	19.088	03:40	35.024	12:20	33.497	20.444	23.131	39.365	51.616	48.819	35.557	26.041	23.001	19.572	03:00	54.082	11:10	26.688	16.382	18.127	28.29	36.839	37.104	30.89	24.724	21.149
	SA17	24.121	17.824	18.069	22.114	27.042	29.473	29.193	26.456	22.794	17.275	03:40	29.823	14:40	26.21	20.3	19.618	24.873	32.597	33.978	29.693	25.693	22.93	19.126	03:40	35.096	12:20	33.702	20.635	23.215	39.424	51.754	49.043	35.888	26.389	23.265	19.711	03:00	54.252	11:10	26.802	16.48	18.164	28.28	36.902	37.231	31.088	24.958	21.313
	SA18	24.076	17.78	18.062	22.114	27	29.442	29.104	26.371	22.738	17.316	03:40	29.722	14:10	26.134	20.263	19.587	24.81	32.5	33.874	29.581	25.598	22.857	19.107	04:00	34.997	12:20	33.5	20.531	23.113	39.207	51.482	48.742	35.603	26.197	23.129	19.636	03:00	53.975	11:10	26.717	16.442	18.162	28.215	36.804	37.129	30.915	24.831	21.237
	SA19	24.108	17.782	18.077	22.13	27.052	29.506	29.175	26.395	22.743	17.305	03:20	29.867	14:40	26.231	20.283	19.623	24.944	32.69	34.065	29.707	25.654	22.879	19.119	03:40	35.161	12:20	33.738	20.543	23.26	39.655	51.969	49.211	35.881	26.243	23.139	19.642	03:00	54.413	11:10	26.801	16.431	18.165	28.397	36.965	37.348	31.052	24.841	21.207
	SA20	24.078	17.778	18.061	22.099	26.999	29.444	29.136	26.374	22.733	17.31	03:40	29.751	14:40	26.042	20.237	19.558	24.76	32.369	33.682	29.44	25.507	22.781	19.076	04:00	34.791	12:20	33.546	20.522	23.155	39.35	51.607	48.832	35.641	26.165	23.094	19.623	03:00	54.077	11:10	26.709	16.442	18.142	28.2	36.797	37.141	30.923	24.81	21.216
	SA21	24.102	17.791	18.068	22.139	27.043	29.476	29.159	26.39	22.752	17.299	03:30	29.81	14:40	26.375	20.326	19.67	25.039	32.957	34.384	29.891	25.761	22.971	19.166	03:40	35.538	12:20	33.683	20.562	23.205	39.465	51.833	49.108	35.83	26.28	23.183	19.665	03:00	54.314	11:10	26.798	16.442	18.178	28.348	36.938	37.29	31.046	24.875	21.27
	SB01	24.126	18.016	18.243	22.096	26.96	29.394	29.065	26.393	22.839	17.534	03:30	29.699	14:30	25.883	20.435	19.728	24.493	31.84	33.089	29.084	25.496	22.902	19.302	03:40	34.235	12:20	32.994	21.069	23.163	37.946	50.095	47.072	34.579	26.469	23.561	20.174	03:00	52.789	11:10	26.459	16.783	18.262	27.489	36.06	36.269	30.431	24.966	21.407
	SB02	24.073	17.623	17.929	22.107	27.104	29.553	29.237	26.368	22.662	17.115	03:40	29.874	14:40	26.512	20.136	19.528	25.266	33.419	34.878	30.255	25.771	22.844	18.945	03:40	35.953	12:10	34.251	19.995	23.358	40.798	53.358	50.865	37.043	25.926	22.666	19.08	03:00	55.69	11:10	27.165	16.243	18.288	29.058	37.926	38.275	31.73	24.759	21.041
	SB03	24.099	17.787	18.069	22.147	27.032	29.481	29.146	26.389	22.742	17.314	03:40	29.81	14:40	26.176	20.274	19.604	24.87	32.579	33.954	29.637	25.625	22.868	19.115	03:40	35.078	12:20	33.595	20.543	23.177	39.38	51.655	48.917	35.72	26.225	23.14	19.646	03:00	54.142	11:10	26.763	16.452	18.173	28.312	36.88	37.229	30.965	24.86	21.23
	SB04	24.081	17.775	18.06	22.108	27.01	29.461	29.129	26.372	22.73	17.305	03:30	29.785	14:40	26.172	20.27	19.6	24.864	32.578	33.954	29.632	25.616	22.862	19.114	04:00	35.06	12:20	33.608	20.534	23.177	39.413	51.716	48.96	35.729	26.209	23.127	19.635	03:00	54.204	11:10	26.744	16.446	18.149	28.283	36.886	37.194	30.957	24.834	21.205
	SB05	24.096	17.8	18.085	22.13	27.002	29.459	29.151	26.389	22.755	17.309	03:30	29.853	14:40	26.173	20.279	19.611	24.871	32.563	33.93	29.635	25.622	22.871	19.122	04:00	35.027	12:20	33.591	20.537	23.18	39.388	51.662	48.905	35.712	26.211	23.131	19.641	03:00	54.114	11:10	26.729	16.44	18.173	28.252	36.764	37.17	30.978	24.84	21.215
	SB06	24.071	17.781	18.056	22.111	27.01	29.421	29.111	26.359	22.719	17.306	03:40	29.746	14:40	26.168	20.274	19.601	24.867	32.585	33.938	29.621	25.608	22.854	19.11	04:00	35.013	12:20	33.613	20.533	23.181	39.434	51.75	48.969	35.725	26.197	23.117	19.632	03:00	54.245	11:10	26.735	16.433	18.165	28.285	36.902	37.134	30.952	24.82	21.191
	SB07	24.075	17.764	18.059	22.103	27.012	29.446	29.127	26.365	22.726	17.301	03:40	29.775	14:40	26.166	20.264	19.596	24.863	32.571	33.94	29.626	25.611	22.856	19.107	04:00	35.035	12:20	33.591	20.527	23.168	39.39	51.679	48.928	35.71	26.205	23.123	19.627	03:00	54.138	11:10	26.745	16.417	18.174	28.273	36.886	37.176	30.955	24.83	21.248
	SB09	23.983	17.667	17.968	22.051	26.936	29.378	29.058	26.208	22.596	17.184	03:40	29.673	14:50	26.113	20.222	19.544	24.824	32.535	33.901	29.576	25.529	22.774	19.04	04:00	34.978	12:20	33.524	20.466	23.108	39.355	51.626	48.869	35.641	26.1	23.024	19.557	03:00	54.116	11:10	26.654	16.353	18.069	28.2	36.804	37.105	30.896	24.705	21.1
	SB10	24.282	17.853	18.151	22.246	27.259	29.739	29.508	26.634	22.865	17.361	03:30	30.096	14:30	28.258	21.373	20.571	27.25	35.916	37.542	32.462	27.137	23.812	19.888	03:40	38.558	12:30	38.484	21.111	26.471	48.469	61.118	58.126	41.724	27.303	23.552	20.043	03:00	63.293	11:10	28.717	16.381	19.273	31.97	40.898	41.279	33.637	25.178	21.125
	SB11	24.018	17.582	17.98	22.099	26.957	29.365	29.183	26.364	22.614	17.111	03:30	29.706	14:40	25.712	17.803	18.932	27.757	35.181	34.622	28.094	23.019	20.291	17.109	03:10	36.945	11:20	35.66	19.604	25.124	45.429	55.799	53.155	38.674	25.462	22.038	18.767	03:00	57.517	11:10	27.335	15.772	18.721	30.377	38.198	38.73	32.1	24.335	20.45
	SB12	23.915	17.782	18.045	21.994	26.775	29.237	28.784	26.048	22.653	17.302	03:30	29.505	14:40	24.956	19.754	19.078	23.369	30.203	31.73	28.142	24.875	22.494	18.738	04:00	32.609	12:10	30.842	20.275	21.684	34.316	45.591	43.584	32.631	25.678	22.976	19.474	03:10	48.37	11:10	25.606	16.553	17.769	26.043	34.145	34.816	29.567	24.63	21.326
	SB13	24.069	17.783	18.061	22.116	26.997	29.451	29.099	26.335	22.712	17.309	03:40	29.757	14:40	26.115	20.219	19.545	24.805	32.502	33.88	29.569	25.573	22.829	19.068	03:50	34.984	12:20	33.455	20.495	23.047	39.188	51.411	48.694	35.536	26.167	23.104	19.599	03:00	53.89	11:10	26.683	16.436	18.135	28.201	36.732	37.104	30.874	24.783	21.197
	SB14	24.052	17.795	18.058	22.099	26.984	29.422	29.064	26.296	22.7	17.292	03:40	29.711	14:30	26.087	20.208	19.524	24.775	32.462	33.848	29.528	25.543	22.811	19.056	04:00	34.959	12:20	33.365	20.487	22.959	39.071	51.244	48.548	35.395	26.131	23.087	19.598	03:00	53.722	11:10	26.658	16.481	18.122	28.169	36.693	37.065	30.779	24.764	21.186
	SB15	24.044	17.812	18.059	22.081	26.967	29.422	29.032	26.282	22.7	17.324	03:40	29.691	14:20	26.066	20.191	19.512	24.745	32.444	33.828	29.49	25.515	22.799	19.048	04:00	34.876	12:10	33.317	20.483	22.941	38.99	51.176	48.428	35.322	26.114	23.086	19.598	03:00	53.674	11:10	26.712	16.574	18.239	28.138	36.752	37.112	30.816	24.821	21.245
	SB16	24.12	17.788	18.082	22.159	27.07	29.514	29.192	26.411	22.747	17.301	03:30	29.843	14:30	26.518	20.4	19.767	25.425	33.277	34.564	29.995	25.784	22.937	19.205	03:40	35.768	12:20	34.47	20.592	23.771	41.268	53.527	50.596	36.517	26.343	23.148	19.664	03:00	55.891	11:10	27.06	16.399	18.364	29.003	37.549	37.875	31.276	24.85	21.164
	SB17	24.095	17.785	18.064	22.119	27.031	29.469	29.151	26.395	22.746	17.287	03:40	29.813	14:40	26.176	20.27	19.594	24.864	32.575	33.962	29.643	25.632	22.871	19.102	04:00	35.074	12:20	33.603	20.534	23.159	39.394	51.68	48.961	35.733	26.228	23.138	19.631	03:10	54.178	11:10	26.751	16.439	18.147	28.279	36.85	37.227	30.981	24.845	21.237
[truncated: 17 more columns]

## Sheet: diff_Delnicka
		theta													t_surf													MRT													PET
		AVG	00-03	03-06	06-09	9-12	12-15	15-18	18-21	21-24	MIN	TIME	MAX	TIME	AVG	00-03	03-06	06-09	9-12	12-15	15-18	18-21	21-24	MIN	TIME	MAX	TIME	AVG	00-03	03-06	06-09	9-12	12-15	15-18	18-21	21-24	MIN	TIME	MAX	TIME	AVG	00-03	03-06	06-09	9-12	12-15	15-18	18-21	21-24
	SA01	-0.098	-0.037	-0.078	-0.118	-0.124	-0.159	-0.117	-0.093	-0.062	-0.499	12:20	0.145	12:30	-0.299	-0.087	-0.091	-0.413	-0.499	-0.527	-0.426	-0.208	-0.141	-0.681	12:20	-0.031	04:40	0.538	-0.062	0.327	1.116	1.476	1.229	0.455	-0.131	-0.109	-0.177	19:10	1.559	09:50	0.221	-0.026	0.133	0.565	0.648	0.515	0.055	-0.111	-0.008
	SA02	0.075	0.029	0.064	0.13	0.103	0.062	0.102	0.067	0.042	-0.276	12:20	0.383	11:10	0.264	0.082	0.076	0.444	0.482	0.398	0.358	0.161	0.112	0.01	04:50	0.68	10:20	-0.516	0.057	-0.308	-1.02	-1.381	-1.21	-0.446	0.098	0.078	-1.486	11:40	0.134	19:30	-0.233	0.043	-0.113	-0.245	-0.789	-0.691	-0.116	0.047	-0.001
	SA03	-0.004	0.006	0.022	-0.009	0.022	-0.055	-0.028	0.001	0.009	-0.286	08:00	0.181	11:20	0.081	0.08	0.082	0.115	0.097	0.046	0.075	0.077	0.078	-0.065	14:00	0.255	08:40	-0.064	-0.014	-0.018	-0.071	-0.096	-0.141	-0.11	-0.04	-0.024	-0.212	14:10	0.053	05:40	-0.051	-0.002	0.069	0.032	-0.108	-0.213	-0.127	-0.041	-0.017
	SA04	-0.07	-0.074	-0.073	-0.057	-0.099	-0.074	-0.048	-0.07	-0.068	-0.267	10:10	0.137	06:50	-0.309	-0.239	-0.232	-0.29	-0.401	-0.383	-0.353	-0.3	-0.276	-0.531	13:30	-0.201	02:20	0.38	0.328	0.296	0.386	0.446	0.502	0.444	0.318	0.322	0.24	05:10	0.56	14:50	0.058	0.034	-0.076	0.134	-0.087	0.179	0.091	0.085	0.105
	SA05	0.105	0.133	0.139	0.092	0.076	0.05	0.085	0.131	0.132	-0.279	11:40	0.444	10:20	0.751	0.622	0.56	0.732	0.864	0.871	0.912	0.754	0.692	0.515	04:50	1.05	10:50	-1.051	-0.843	-0.792	-1.075	-1.31	-1.445	-1.241	-0.856	-0.846	-1.522	13:20	-0.746	04:10	-0.382	-0.11	-0.291	-0.38	-0.52	-0.711	-0.446	-0.294	-0.307
	SA06	0.004	0.039	0.048	0.025	0.015	-0.025	-0.025	-0.035	-0.008	-0.234	12:20	0.192	12:10	-0.314	-0.161	-0.143	-0.33	-0.501	-0.582	-0.405	-0.223	-0.166	-0.746	12:40	-0.098	04:40	-0.241	-0.174	-0.194	-0.245	-0.353	-0.386	-0.26	-0.17	-0.143	-0.48	12:40	-0.122	00:10	-0.136	-0.063	-0.082	-0.194	-0.255	-0.255	-0.133	-0.066	-0.042
	SA07	-0.039	-0.081	-0.07	-0.092	-0.085	-0.031	-0.001	0.029	0.017	-0.29	09:10	0.109	14:50	0.343	0.201	0.146	0.371	0.515	0.562	0.466	0.273	0.213	0.096	05:20	0.627	14:20	0.224	0.208	0.141	0.211	0.216	0.255	0.32	0.235	0.208	-0.165	05:20	0.354	15:50	0.056	0	-0.033	0.172	-0.064	0.016	0.158	0.105	0.094
	SA08	0.001	0.001	-0.011	0.008	0.005	0.013	-0.01	-0.001	-0.001	-0.339	10:10	0.295	10:20	0.002	-0.005	-0.012	-0.009	0.017	0.004	0.014	0.003	-0.001	-0.155	08:00	0.11	08:40	0.001	-0.003	-0.009	-0.002	0.005	0.006	0.01	0.004	-0.002	-0.075	08:00	0.057	08:40	-0.044	-0.016	-0.134	-0.095	-0.036	-0.011	-0.009	-0.002	-0.053
	SA09	-0.01	-0.006	-0.005	-0.015	0.006	-0.06	0.005	-0.002	-0.006	-0.224	13:00	0.297	12:00	-0.013	-0.01	-0.002	0.008	-0.016	-0.079	0	0.004	-0.011	-0.212	12:40	0.17	10:20	-0.009	-0.007	-0.003	0.002	-0.011	-0.041	0	0.002	-0.01	-0.099	14:10	0.094	10:30	-0.05	-0.042	-0.036	0.072	-0.148	-0.211	0.035	0.009	-0.08
	SA10	-0.002	-0.003	-0.007	0.019	0.014	-0.017	-0.014	-0.005	-0.001	-0.364	10:10	0.327	08:40	-0.003	0	0.003	-0.004	0.029	-0.035	-0.012	-0.005	0.001	-0.15	13:30	0.184	08:40	-0.016	0	-0.006	-0.024	-0.025	-0.048	-0.02	-0.004	-0.001	-0.125	10:10	0.071	08:40	-0.027	-0.016	-0.021	-0.091	0.054	-0.092	-0.043	-0.017	0.008
	SA11	-0.01	-0.006	0.005	-0.013	-0.014	-0.026	-0.023	0.002	-0.002	-0.236	08:30	0.188	08:40	-0.001	-0.016	0.001	0.018	-0.019	0.006	-0.008	0.006	0.001	-0.173	11:30	0.109	08:40	0.011	-0.012	0.009	0.031	0.025	0.03	0.01	0.001	-0.004	-0.05	11:30	0.094	08:40	-0.017	-0.048	-0.017	0.055	-0.09	-0.007	-0.02	-0.001	-0.003
	SA12	-0.028	0.041	0.017	-0.087	-0.124	-0.083	-0.036	0.013	0.032	-0.342	12:40	0.225	12:30	-0.138	0.214	0.104	-0.432	-0.6	-0.481	-0.17	0.094	0.17	-0.742	11:30	0.246	01:30	-0.074	0.143	0.073	-0.191	-0.347	-0.294	-0.117	0.035	0.103	-0.437	11:30	0.167	02:10	-0.093	0.038	-0.102	-0.157	-0.344	-0.195	-0.043	0.02	0.038
	SA13	-0.013	-0.108	-0.077	0.075	0.051	0.009	0.029	-0.022	-0.058	-0.255	10:10	0.345	08:40	0.107	-0.333	-0.183	0.536	0.62	0.449	0.168	-0.151	-0.251	-0.368	01:40	0.735	08:40	0.05	-0.235	-0.152	0.238	0.363	0.291	0.131	-0.069	-0.165	-0.271	02:50	0.44	11:20	0.005	-0.204	-0.11	0.242	0.128	0.048	0.089	-0.044	-0.112
	SA14	0.007	0.092	0.075	-0.018	-0.079	-0.09	-0.023	0.032	0.063	-0.313	11:40	0.227	07:40	-0.066	0.327	0.212	-0.345	-0.51	-0.465	-0.15	0.163	0.243	-0.629	11:40	0.368	01:30	0.006	0.264	0.202	-0.096	-0.252	-0.253	-0.089	0.097	0.177	-0.341	12:40	0.293	02:10	-0.055	0.068	0.08	-0.023	-0.262	-0.266	-0.112	0.017	0.062
	SA15	-0.024	-0.14	-0.111	0.067	0.089	0.024	0.005	-0.044	-0.081	-0.253	02:50	0.309	08:20	0.046	-0.429	-0.266	0.477	0.596	0.41	0.127	-0.229	-0.319	-0.483	01:40	0.711	08:30	-0.028	-0.354	-0.276	0.158	0.303	0.231	0.088	-0.137	-0.238	-0.392	01:40	0.378	11:20	-0.01	-0.153	-0.109	0.181	0.111	0.002	0.065	-0.075	-0.101
	SA16	-0.04	-0.039	-0.033	0.014	-0.036	-0.087	-0.021	-0.067	-0.047	-0.264	10:10	0.176	08:40	-0.038	-0.028	-0.037	0.033	-0.023	-0.103	-0.04	-0.054	-0.051	-0.243	13:40	0.207	08:40	-0.099	-0.09	-0.052	-0.004	-0.072	-0.155	-0.143	-0.16	-0.118	-0.224	13:40	0.075	08:40	-0.086	-0.07	-0.143	0.144	-0.155	-0.241	-0.07	-0.121	-0.033
	SA17	0.014	0.029	-0.007	-0.02	0.016	-0.045	0.036	0.057	0.044	-0.212	10:10	0.146	11:20	0.014	0.013	0.003	0.006	-0.009	-0.043	0.046	0.05	0.045	-0.172	12:40	0.158	08:40	0.082	0.082	0.026	0.023	0.047	0.069	0.146	0.154	0.112	-0.039	10:10	0.181	17:50	-0.009	0.007	-0.087	-0.029	-0.029	-0.115	0.066	0.074	0.045
	SA18	-0.013	-0.016	-0.019	0.027	-0.049	-0.039	-0.002	-0.005	0	-0.455	10:10	0.359	10:00	-0.019	-0.019	-0.024	0.014	-0.092	-0.048	0.021	-0.002	-0.004	-0.261	11:30	0.125	13:00	-0.047	-0.012	-0.035	-0.064	-0.114	-0.102	-0.039	-0.007	-0.003	-0.198	11:30	0.016	01:30	-0.044	-0.055	-0.09	0.098	-0.241	-0.04	0.077	-0.029	-0.072
	SA19	0.007	0.003	0.021	0.002	0.009	-0.002	0.018	0.004	0.002	-0.319	11:40	0.236	10:00	0.027	0.02	0.026	0.055	0.027	0.018	0.05	0.014	0.007	-0.119	11:40	0.14	08:30	0.058	0.011	0.046	0.123	0.092	0.093	0.088	0.011	-0.001	-0.014	23:40	0.186	08:30	0.014	0.031	0.032	0.088	-0.086	0.019	0.06	-0.02	-0.012
	SA20	-0.009	-0.008	-0.001	-0.006	-0.019	-0.035	0.006	-0.007	-0.005	-0.468	10:10	0.225	10:20	-0.032	-0.014	-0.019	-0.002	-0.044	-0.077	-0.048	-0.03	-0.025	-0.185	11:00	0.082	08:20	-0.016	-0.009	-0.01	0	-0.02	-0.04	-0.021	-0.015	-0.015	-0.102	14:10	0.04	10:20	-0.009	-0.021	-0.04	0.098	-0.012	-0.033	-0.017	-0.011	-0.037
	SA21	-0.003	0.009	-0.005	0.026	-0.027	-0.052	0.019	0	0.006	-0.208	13:00	0.226	07:40	0.056	0.025	0.024	0.077	0.093	0.066	0.093	0.042	0.032	-0.035	06:40	0.284	08:40	0.024	0.014	0.015	0.037	0.036	0.02	0.04	0.019	0.014	-0.031	14:10	0.143	08:40	-0.016	0.046	-0.057	0.02	-0.096	-0.087	0.058	-0.021	0.012
	SB01	0.038	0.203	0.153	0.044	-0.069	-0.108	-0.031	0.026	0.086	-0.398	11:40	0.356	04:00	-0.076	0.291	0.1	-0.158	-0.635	-0.405	-0.062	0.089	0.169	-0.906	11:40	0.409	01:30	-0.228	0.624	-0.503	-0.602	-1.06	-0.731	-0.49	0.416	0.518	-2.171	05:20	0.722	01:30	0.248	0.617	0.014	0.35	-0.018	0.241	0.174	0.332	0.273
	SB02	-0.03	-0.127	-0.121	-0.035	0.013	0.037	0.083	-0.024	-0.069	-0.451	10:10	0.417	10:20	0.136	-0.185	0.02	0.267	0.516	0.378	0.26	-0.035	-0.133	-0.229	02:30	0.749	12:10	0.277	-0.553	0.64	0.626	0.934	0.68	0.816	-0.408	-0.523	-0.58	01:50	2.408	05:00	-0.084	-0.299	0.149	-0.011	-0.069	-0.083	0.211	-0.328	-0.245
	SB03	0.009	0.007	-0.003	0.042	0.021	-0.018	0.001	0.013	0.005	-0.176	12:40	0.323	10:00	0.083	0.039	0.036	0.132	0.173	0.122	0.084	0.048	0.03	-0.015	13:40	0.305	10:40	-0.052	0.03	-0.011	-0.105	-0.174	-0.168	-0.035	0.029	0.022	-0.243	12:40	0.071	01:30	-0.035	0.045	-0.029	0.004	-0.104	-0.138	-0.035	-0.002	-0.017
	SB04	-0.08	-0.022	-0.052	-0.106	-0.134	-0.157	-0.098	-0.044	-0.028	-0.314	10:10	0.177	10:20	-1.229	-0.233	-0.424	-1.716	-2.305	-2.375	-1.672	-0.693	-0.414	-2.565	12:40	-0.173	02:20	0.658	-0.212	0.25	1.731	1.922	1.67	0.531	-0.343	-0.285	-0.376	19:10	2.016	10:20	0.273	-0.066	-0.002	0.964	0.805	0.58	0.212	-0.189	-0.117
	SB05	0.018	0.051	0.032	0.065	-0.014	-0.04	0.016	0.009	0.025	-0.397	12:20	0.378	10:20	-0.574	0	-0.065	-0.828	-1.367	-1.468	-0.801	-0.114	0.047	-1.665	12:40	0.107	23:10	-0.353	-0.609	-0.325	0.131	0.057	-0.167	-0.572	-0.702	-0.64	-0.801	17:30	0.212	06:50	-0.102	-0.117	-0.107	0.287	-0.059	-0.208	-0.139	-0.26	-0.209
	SB06	-0.127	-0.038	-0.055	-0.142	-0.202	-0.263	-0.174	-0.083	-0.062	-0.574	10:10	0.036	04:00	-2.188	-0.647	-0.849	-2.942	-3.929	-4.042	-2.936	-1.314	-0.841	-4.327	12:40	-0.558	04:00	0.973	-0.362	0.367	2.572	2.894	2.514	0.772	-0.535	-0.435	-0.596	19:10	3.048	11:00	0.404	-0.186	0.138	1.278	1.255	0.941	0.27	-0.281	-0.18
	SB07	-0.076	-0.07	-0.018	-0.079	-0.111	-0.147	-0.08	-0.057	-0.045	-0.324	14:30	0.129	15:30	-0.637	-0.575	-0.265	-0.259	-0.741	-0.868	-0.976	-0.781	-0.628	-1.279	16:40	0.167	05:50	-0.204	-0.188	-0.062	-0.052	-0.242	-0.281	-0.323	-0.274	-0.21	-0.466	16:40	0.107	05:50	-0.101	-0.073	0.094	0.028	-0.243	-0.268	-0.187	-0.16	-0.001
	SB09	-0.42	-0.319	-0.259	-0.373	-0.592	-0.641	-0.47	-0.392	-0.316	-0.886	12:20	-0.133	05:00	-4.519	-2.687	-1.819	-3.678	-6.639	-7.15	-6.373	-4.448	-3.357	-7.435	12:30	-1.355	05:40	-1.837	-1.142	-0.78	-1.435	-2.624	-2.758	-2.533	-1.952	-1.468	-2.954	12:40	-0.575	05:20	-0.934	-0.463	-0.318	-0.675	-1.522	-1.579	-1.392	-0.934	-0.587
	SB10	0.065	0.069	0.06	0.05	0.031	0.014	0.115	0.123	0.06	-0.509	12:20	0.355	09:40	0.746	0.545	0.466	0.919	1.108	1.162	0.925	0.51	0.332	0.26	23:50	1.355	14:00	1.494	0.336	1.054	2.768	2.708	2.776	1.816	0.348	0.147	0.1	00:00	3.131	08:00	0.821	0.561	0.794	1.431	1.039	1.398	1.067	0.23	0.049
	SB11	-0.026	-0.052	-0.027	-0.032	-0.041	-0.063	0.023	0.019	-0.038	-0.499	12:20	0.31	09:40	0.437	0.13	0.283	0.806	0.895	0.857	0.507	0.076	-0.058	-0.121	00:00	1.11	09:40	1.127	0.1	0.83	2.309	2.126	2.211	1.432	0.091	-0.079	-0.121	00:00	2.628	07:50	0.62	0.398	0.733	0.893	0.762	1.209	0.927	0.053	-0.018
	SB12	-0.456	-0.101	-0.114	-0.443	-0.697	-0.778	-0.819	-0.521	-0.18	-1.178	12:20	0.029	04:00	-5.203	-1.425	-1.74	-8.018	-9.343	-9.725	-7.286	-2.736	-1.352	-10.185	14:20	-0.883	03:20	-9.38	-0.631	-5.579	-18.723	-16.731	-18.665	-12.656	-1.536	-0.52	-19.873	14:20	-0.265	00:00	-3.39	0.877	-0.789	-7.405	-6.887	-7.789	-5.267	-0.485	0.626
	SB13	-0.202	-0.055	-0.047	-0.204	-0.311	-0.378	-0.352	-0.181	-0.086	-0.659	10:10	0.049	01:30	-2.834	-0.612	-0.976	-4.608	-5.123	-5.415	-3.994	-1.342	-0.606	-5.705	14:20	-0.325	03:20	-5.279	-0.279	-3.944	-10.416	-8.943	-10.07	-7.659	-0.719	-0.203	-11.174	07:30	-0.086	00:00	-1.864	0.664	-0.706	-4.228	-3.654	-4.066	-3.018	-0.211	0.307
	SB14	-0.376	-0.091	-0.101	-0.411	-0.554	-0.679	-0.684	-0.335	-0.149	-0.904	10:10	0.017	04:00	-4.923	-1.271	-1.663	-8.116	-8.243	-8.956	-7.313	-2.575	-1.252	-9.899	14:50	-0.772	03:20	-8.961	-0.584	-5.709	-18.543	-14.403	-17.404	-13.15	-1.402	-0.489	-20.246	14:50	-0.254	00:00	-3.376	0.719	-1.016	-7.567	-6.053	-7.439	-5.657	-0.511	0.519
	SB15	-0.377	-0.048	-0.081	-0.414	-0.561	-0.671	-0.72	-0.37	-0.151	-0.947	10:10	0.081	01:20	-4.94	-1.272	-1.667	-8.152	-8.287	-8.967	-7.331	-2.598	-1.247	-9.908	14:50	-0.763	03:20	-9.108	-0.57	-5.782	-18.835	-14.816	-17.695	-13.277	-1.419	-0.473	-20.472	14:50	-0.247	00:00	-3.244	0.934	-0.847	-7.49	-5.975	-7.359	-5.551	-0.351	0.69
	SB16	0	0.005	0.019	-0.011	0.009	-0.048	0.005	0.017	0.005	-0.331	10:10	0.223	10:20	0.151	0.116	0.078	0.217	0.262	0.188	0.208	0.094	0.047	0.016	00:00	0.37	15:00	0.301	0.063	0.109	0.602	0.589	0.63	0.346	0.065	0.004	-0.016	00:00	0.75	08:20	0.117	0.135	0.12	0.136	0.145	0.16	0.235	0.03	-0.021
	SB17	0.071	0.005	0.044	0.115	0.048	0.064	0.124	0.114	0.056	-0.101	12:30	0.273	10:50	0.029	-0.008	0.001	0.076	0.012	-0.012	0.064	0.064	0.039	-0.138	12:40	0.161	08:40	0.015	-0.007	-0.023	0.042	0.001	-0.011	0.046	0.047	0.022	-0.1	04:50	0.116	17:00	0.026	-0.018	-0.024	0.176	-0.086	-0.065	0.116	0.082	0.028
[truncated: 17 more columns]

## Sheet: diff_Domain
		theta													t_surf													MRT													PET
		AVG	00-03	03-06	06-09	9-12	12-15	15-18	18-21	21-24	MIN	TIME	MAX	TIME	AVG	00-03	03-06	06-09	9-12	12-15	15-18	18-21	21-24	MIN	TIME	MAX	TIME	AVG	00-03	03-06	06-09	9-12	12-15	15-18	18-21	21-24	MIN	TIME	MAX	TIME	AVG	00-03	03-06	06-09	9-12	12-15	15-18	18-21	21-24
	SA01	-0.111	-0.039	-0.087	-0.135	-0.143	-0.161	-0.137	-0.113	-0.071	-0.374	12:20	0.032	12:30	-0.477	-0.16	-0.17	-0.501	-0.905	-0.891	-0.585	-0.352	-0.251	-1.071	11:20	-0.143	02:20	0.533	-0.089	0.273	1.166	1.573	1.254	0.414	-0.179	-0.148	-0.234	19:10	1.672	11:10	0.228	-0.032	0.076	0.581	0.77	0.513	0.132	-0.129	-0.083
	SA02	0.098	0.036	0.066	0.117	0.159	0.143	0.12	0.085	0.06	-0.066	11:40	0.349	12:10	0.409	0.131	0.128	0.443	0.831	0.765	0.49	0.284	0.202	0.104	04:20	1.015	11:20	-0.498	0.075	-0.257	-1.064	-1.447	-1.173	-0.381	0.146	0.119	-1.526	11:00	0.186	19:10	-0.205	0.048	-0.122	-0.429	-0.667	-0.51	-0.101	0.099	0.038
	SA03	0	-0.002	0.011	-0.012	0.018	-0.02	-0.004	-0.002	0.009	-0.126	08:00	0.11	09:30	0.023	0.01	0.013	0.025	0.04	0.027	0.028	0.021	0.017	-0.013	11:00	0.087	11:50	-0.024	0.009	0.003	-0.027	-0.058	-0.078	-0.041	-0.005	0.008	-0.124	04:40	0.042	05:40	-0.023	-0.021	0.023	0.019	-0.056	-0.085	-0.043	-0.011	-0.008
	SA04	-0.055	-0.069	-0.068	-0.041	-0.063	-0.03	-0.038	-0.066	-0.062	-0.171	10:30	0.063	06:50	-0.241	-0.227	-0.222	-0.212	-0.271	-0.261	-0.247	-0.241	-0.245	-0.347	11:20	-0.186	08:20	0.275	0.277	0.24	0.261	0.294	0.344	0.306	0.226	0.251	0.212	19:10	0.377	12:30	0.072	0.04	0.024	0.147	0	0.163	0.107	0.041	0.054
	SA05	0.095	0.118	0.129	0.066	0.062	0.062	0.074	0.121	0.125	-0.081	13:20	0.264	11:20	0.476	0.42	0.401	0.419	0.519	0.56	0.534	0.484	0.467	0.38	07:20	0.638	11:20	-0.72	-0.644	-0.585	-0.701	-0.868	-0.979	-0.818	-0.566	-0.599	-1.051	13:20	-0.532	19:30	-0.263	-0.139	-0.179	-0.289	-0.397	-0.444	-0.29	-0.161	-0.208
	SA06	0.014	0.054	0.049	0.024	0.038	0.005	-0.02	-0.035	-0.005	-0.09	10:10	0.148	09:30	-0.181	-0.1	-0.092	-0.171	-0.284	-0.327	-0.23	-0.136	-0.104	-0.376	12:40	-0.078	05:10	-0.184	-0.159	-0.17	-0.21	-0.236	-0.263	-0.194	-0.123	-0.12	-0.305	05:40	-0.113	23:00	-0.096	-0.037	-0.074	-0.159	-0.119	-0.141	-0.105	-0.072	-0.059
	SA07	-0.033	-0.093	-0.087	-0.09	-0.054	-0.01	0.017	0.035	0.014	-0.176	06:20	0.101	13:30	0.222	0.134	0.107	0.198	0.336	0.387	0.282	0.181	0.148	0.09	05:40	0.46	11:50	0.254	0.234	0.205	0.255	0.29	0.324	0.296	0.215	0.215	0.083	05:20	0.359	14:50	0.082	0.024	0.008	0.118	0.05	0.141	0.144	0.108	0.066
	SA08	0.005	0.002	-0.005	0.004	0.022	0.015	-0.005	0	0.002	-0.1	13:10	0.139	14:50	0.003	0.001	-0.005	0	0.012	0.006	0.006	0.003	0	-0.051	13:10	0.065	11:50	0.002	0.001	-0.004	0	0.005	0.004	0.004	0.002	0	-0.046	13:10	0.04	12:30	-0.013	0	-0.042	-0.042	-0.001	0.01	0.002	-0.005	-0.026
	SA09	0	-0.002	-0.008	-0.005	0.015	-0.009	0.01	0.001	0.001	-0.131	13:50	0.166	12:00	-0.002	-0.002	-0.004	0.002	0	-0.013	0.004	0.002	-0.002	-0.064	14:00	0.08	12:10	-0.002	-0.001	-0.004	0.001	0	-0.012	0.003	0.002	-0.003	-0.056	14:00	0.044	12:10	-0.016	-0.013	-0.043	0.024	-0.018	-0.056	0.013	0	-0.034
	SA10	-0.001	0	-0.005	0.001	0.005	-0.004	-0.004	-0.004	0.004	-0.161	10:10	0.141	08:40	-0.002	0.001	-0.003	-0.004	-0.003	-0.008	-0.001	-0.003	0.001	-0.063	09:40	0.07	11:50	-0.017	0.001	-0.01	-0.028	-0.034	-0.043	-0.022	-0.002	0.002	-0.079	10:10	0.009	01:00	-0.011	-0.004	-0.039	0.026	-0.023	-0.028	0.001	-0.006	-0.016
	SA11	0.002	0.001	0.007	-0.01	0.017	-0.003	-0.001	0.003	0.002	-0.124	10:30	0.087	13:30	0.002	-0.001	0.002	0.002	0.004	0.003	0.003	0.003	0.002	-0.061	10:30	0.044	11:40	0.017	-0.001	0.01	0.03	0.037	0.038	0.022	0.001	-0.001	-0.014	08:30	0.057	14:50	-0.015	-0.015	-0.008	-0.04	-0.028	-0.009	-0.007	-0.007	-0.002
	SA12	-0.02	0.05	0.035	-0.067	-0.093	-0.075	-0.046	0.002	0.034	-0.248	10:50	0.162	12:30	-0.155	0.119	0.073	-0.27	-0.527	-0.439	-0.225	-0.033	0.061	-0.612	11:20	0.143	02:10	-0.072	0.107	0.071	-0.129	-0.28	-0.254	-0.144	-0.01	0.064	-0.328	09:50	0.131	02:10	-0.07	0.048	-0.011	-0.097	-0.236	-0.198	-0.092	-0.006	0.029
	SA13	0.001	-0.092	-0.069	0.051	0.072	0.06	0.043	-0.007	-0.053	-0.127	02:50	0.206	10:00	0.141	-0.191	-0.131	0.315	0.568	0.454	0.226	0.001	-0.114	-0.222	03:00	0.668	11:20	0.06	-0.171	-0.131	0.154	0.297	0.277	0.165	-0.006	-0.105	-0.205	02:50	0.357	11:20	0.015	-0.13	-0.079	0.135	0.106	0.107	0.092	-0.015	-0.092
	SA14	0.015	0.097	0.085	-0.024	-0.053	-0.06	-0.018	0.026	0.065	-0.202	13:50	0.137	02:20	-0.064	0.234	0.183	-0.185	-0.439	-0.37	-0.139	0.056	0.148	-0.496	11:40	0.259	02:10	0.01	0.22	0.187	-0.04	-0.19	-0.198	-0.083	0.051	0.132	-0.243	12:40	0.244	02:10	-0.013	0.1	0.073	-0.01	-0.154	-0.152	-0.033	0.021	0.05
	SA15	-0.026	-0.141	-0.121	0.025	0.071	0.047	0.02	-0.034	-0.076	-0.189	02:50	0.13	11:50	0.053	-0.315	-0.245	0.233	0.516	0.384	0.145	-0.091	-0.202	-0.341	02:50	0.595	11:20	-0.026	-0.297	-0.257	0.058	0.226	0.213	0.095	-0.071	-0.176	-0.326	03:20	0.298	11:20	-0.026	-0.174	-0.145	0.055	0.105	0.061	0.05	-0.046	-0.113
	SA16	-0.036	-0.037	-0.018	-0.004	-0.019	-0.044	-0.036	-0.077	-0.049	-0.119	10:30	0.08	10:00	-0.036	-0.025	-0.023	-0.004	-0.022	-0.053	-0.043	-0.063	-0.056	-0.101	13:40	0.026	11:50	-0.095	-0.086	-0.042	-0.021	-0.066	-0.12	-0.144	-0.159	-0.118	-0.173	18:20	-0.003	07:50	-0.068	-0.065	-0.058	0.014	-0.074	-0.123	-0.062	-0.109	-0.067
	SA17	0.028	0.035	0	-0.008	0.025	0.001	0.051	0.07	0.053	-0.146	13:10	0.105	13:30	0.029	0.02	0.008	0.009	0.016	0.011	0.049	0.061	0.056	-0.048	12:40	0.069	11:50	0.089	0.085	0.029	0.026	0.06	0.086	0.151	0.16	0.12	-0.01	06:10	0.179	17:40	0.036	0.016	-0.035	0.018	0.033	0.004	0.1	0.096	0.06
	SA18	-0.016	-0.005	-0.012	-0.01	-0.023	-0.032	-0.029	-0.013	-0.003	-0.151	10:10	0.162	10:00	-0.042	-0.009	-0.018	-0.041	-0.091	-0.092	-0.051	-0.025	-0.011	-0.15	14:00	-0.002	01:30	-0.099	-0.005	-0.053	-0.161	-0.225	-0.213	-0.109	-0.021	-0.004	-0.259	10:50	0.002	23:20	-0.042	-0.007	-0.025	-0.038	-0.105	-0.103	-0.038	-0.008	-0.015
	SA19	0.018	-0.007	0.01	0.01	0.042	0.034	0.039	0.015	0.006	-0.087	10:30	0.145	11:30	0.054	0.004	0.012	0.066	0.112	0.11	0.081	0.035	0.013	-0.006	02:50	0.147	12:30	0.13	-0.002	0.064	0.224	0.296	0.275	0.156	0.028	0.002	-0.01	02:00	0.325	10:20	0.027	-0.033	-0.038	0.103	0.062	0.102	0.078	-0.011	-0.049
	SA20	-0.008	-0.008	-0.007	-0.018	-0.01	-0.016	0.001	-0.006	-0.003	-0.206	10:10	0.107	10:20	-0.078	-0.024	-0.032	-0.057	-0.121	-0.156	-0.117	-0.067	-0.051	-0.197	14:00	-0.018	01:30	-0.034	-0.012	-0.017	-0.026	-0.047	-0.068	-0.047	-0.031	-0.025	-0.099	14:00	-0.006	06:20	-0.036	-0.021	-0.048	-0.03	-0.055	-0.046	-0.031	-0.026	-0.033
	SA21	0.008	0.005	-0.001	0.014	0.016	-0.005	0.021	0.007	0.011	-0.135	10:30	0.128	10:00	0.116	0.03	0.036	0.102	0.217	0.236	0.159	0.083	0.062	0.019	03:10	0.299	11:50	0.048	0.013	0.016	0.044	0.085	0.09	0.069	0.039	0.03	0.004	03:10	0.131	11:50	0.016	-0.008	-0.022	0.045	0.006	0.029	0.057	0.01	0.014
	SB01	0.013	0.204	0.158	-0.038	-0.091	-0.115	-0.093	-0.004	0.083	-0.297	10:40	0.296	01:20	-0.232	0.164	0.091	-0.344	-0.653	-0.692	-0.39	-0.082	0.049	-0.785	13:20	0.202	01:30	-0.449	0.502	-0.159	-1.256	-1.166	-1.396	-0.803	0.273	0.412	-1.692	08:40	0.543	01:20	-0.139	0.337	0.043	-0.479	-0.472	-0.549	-0.289	0.146	0.152
	SB02	-0.013	-0.149	-0.125	-0.007	0.072	0.08	0.1	-0.01	-0.067	-0.19	03:00	0.318	11:50	0.274	-0.121	-0.037	0.401	0.704	0.724	0.452	0.102	-0.033	-0.153	03:00	0.838	11:50	0.487	-0.488	0.296	1.283	1.214	1.366	0.94	-0.288	-0.429	-0.508	03:00	1.603	08:10	0.278	-0.196	0.155	0.665	0.686	0.681	0.519	-0.112	-0.177
	SB03	0.028	0.004	0.004	0.043	0.046	0.051	0.038	0.025	0.014	-0.066	09:40	0.193	10:00	0.367	0.078	0.101	0.433	0.763	0.737	0.485	0.22	0.12	0.053	02:50	0.887	11:20	-0.135	0.111	-0.002	-0.366	-0.612	-0.409	-0.055	0.13	0.12	-0.805	11:10	0.143	19:00	-0.064	0.033	-0.024	-0.136	-0.307	-0.155	-0.007	0.062	0.023
	SB04	-0.017	-0.013	-0.016	-0.027	-0.02	-0.025	-0.015	-0.011	-0.007	-0.137	13:50	0.12	10:20	-0.147	-0.03	-0.062	-0.23	-0.25	-0.26	-0.191	-0.087	-0.065	-0.318	09:40	-0.022	02:20	0.119	0.01	0.06	0.275	0.268	0.262	0.104	-0.021	-0.009	-0.028	18:40	0.323	06:50	0.034	-0.005	-0.019	0.151	0.089	0.074	0.037	-0.021	-0.034
	SB05	0.031	0.031	0.027	0.041	0.032	0.026	0.043	0.022	0.029	-0.096	12:30	0.178	11:20	0.123	0.083	0.091	0.117	0.149	0.107	0.151	0.152	0.135	0.062	12:50	0.223	11:20	-0.252	-0.145	-0.14	-0.276	-0.49	-0.427	-0.263	-0.142	-0.136	-0.676	11:10	-0.126	19:50	-0.108	-0.031	-0.059	-0.087	-0.31	-0.21	-0.062	-0.047	-0.058
	SB06	-0.041	-0.012	-0.024	-0.044	-0.049	-0.084	-0.052	-0.037	-0.029	-0.249	10:10	0.076	11:00	-0.517	-0.189	-0.226	-0.662	-0.9	-0.927	-0.667	-0.332	-0.236	-1.006	12:40	-0.172	03:20	0.23	-0.046	0.085	0.57	0.674	0.564	0.165	-0.102	-0.074	-0.122	19:10	0.731	11:00	0.075	-0.036	-0.003	0.28	0.276	0.164	0.043	-0.064	-0.063
	SB07	-0.033	-0.034	-0.019	-0.032	-0.038	-0.057	-0.03	-0.031	-0.023	-0.19	13:10	0.116	15:00	-0.212	-0.19	-0.108	-0.069	-0.229	-0.358	-0.297	-0.242	-0.206	-0.46	13:10	-0.022	05:50	-0.082	-0.074	-0.041	-0.029	-0.087	-0.139	-0.113	-0.096	-0.08	-0.196	13:10	-0.003	05:50	-0.047	-0.048	-0.015	-0.006	-0.053	-0.113	-0.07	-0.057	-0.014
	SB09	-0.253	-0.214	-0.164	-0.189	-0.308	-0.326	-0.272	-0.308	-0.247	-0.455	12:20	-0.105	05:20	-1.96	-1.365	-0.881	-1.207	-2.7	-3.032	-2.73	-2.107	-1.655	-3.299	12:40	-0.518	05:50	-0.812	-0.595	-0.388	-0.481	-1.085	-1.174	-1.089	-0.938	-0.742	-1.317	12:40	-0.223	05:50	-0.44	-0.292	-0.191	-0.23	-0.666	-0.692	-0.575	-0.499	-0.374
	SB10	0.155	0.041	0.057	0.091	0.163	0.193	0.311	0.252	0.128	-0.122	12:20	0.439	17:50	1.548	0.731	0.671	1.759	2.69	2.774	2.055	1.082	0.62	0.49	00:00	2.96	12:10	3.857	0.361	2.366	6.826	8.083	7.594	4.599	0.807	0.223	0.143	00:00	8.299	10:50	1.368	-0.165	0.647	2.507	3.041	3.043	1.922	0.152	-0.201
	SB11	-0.025	-0.153	-0.068	-0.013	-0.027	-0.042	0.096	0.06	-0.05	-0.312	12:20	0.229	18:00	0.166	-1.195	-0.224	1.99	2.282	1.191	-0.286	-1.141	-1.286	-1.358	00:10	2.6	09:50	2.301	-0.482	1.615	5.163	5.165	4.868	2.921	-0.218	-0.624	-0.653	00:00	5.767	08:10	0.589	-0.538	0.34	1.585	1.556	1.653	1.041	-0.337	-0.59
	SB12	-0.252	-0.024	-0.045	-0.21	-0.351	-0.371	-0.498	-0.399	-0.115	-0.681	18:10	0.044	02:00	-2.194	-0.721	-0.818	-3.266	-4.024	-3.913	-2.949	-1.241	-0.617	-4.16	10:10	-0.431	00:00	-4.442	-0.27	-2.619	-8.937	-8.647	-8.661	-5.58	-0.653	-0.168	-9.405	08:10	-0.058	23:50	-1.72	0.306	-0.572	-3.668	-3.679	-3.696	-2.404	-0.246	0.197
	SB13	-0.051	-0.013	-0.017	-0.039	-0.066	-0.079	-0.09	-0.07	-0.036	-0.172	13:10	0.077	10:00	-0.503	-0.132	-0.192	-0.801	-0.883	-0.934	-0.702	-0.256	-0.126	-0.977	14:00	-0.08	03:40	-0.968	-0.069	-0.729	-1.889	-1.653	-1.831	-1.375	-0.151	-0.051	-2.008	07:20	-0.028	23:50	-0.346	0.11	-0.142	-0.699	-0.681	-0.733	-0.572	-0.07	0.015
	SB14	-0.093	-0.011	-0.026	-0.089	-0.112	-0.154	-0.172	-0.125	-0.058	-0.281	12:40	0.045	01:00	-0.869	-0.246	-0.312	-1.414	-1.43	-1.549	-1.271	-0.483	-0.248	-1.702	14:50	-0.152	03:20	-1.636	-0.121	-1.065	-3.349	-2.666	-3.139	-2.354	-0.287	-0.109	-3.597	07:30	-0.057	00:00	-0.63	0.145	-0.189	-1.352	-1.127	-1.347	-1.063	-0.144	0.04
	SB15	-0.122	0.002	-0.027	-0.118	-0.162	-0.188	-0.24	-0.172	-0.068	-0.364	12:20	0.078	01:20	-1.048	-0.325	-0.381	-1.615	-1.876	-1.873	-1.443	-0.582	-0.288	-1.941	09:40	-0.202	00:00	-2.044	-0.147	-1.204	-4.004	-3.905	-3.995	-2.647	-0.339	-0.108	-4.297	07:30	-0.06	00:00	-0.676	0.265	-0.094	-1.583	-1.501	-1.511	-1.049	-0.064	0.129
	SB16	0.028	-0.001	0.013	0.028	0.046	0.04	0.048	0.034	0.013	-0.062	10:40	0.197	11:20	0.298	0.132	0.141	0.426	0.628	0.546	0.308	0.141	0.062	0.042	00:00	0.736	11:50	0.792	0.046	0.469	1.504	1.832	1.634	0.756	0.094	0	-0.015	23:40	1.913	11:20	0.292	-0.013	0.164	0.578	0.689	0.657	0.312	0.006	-0.06
	SB17	0.025	0	0.006	0.028	0.029	0.023	0.046	0.042	0.022	-0.075	09:00	0.122	10:50	0.01	-0.005	-0.009	0.015	0.002	0.011	0.027	0.026	0.015	-0.07	10:30	0.078	11:50	0.007	-0.006	-0.02	0.01	-0.003	0.018	0.025	0.026	0.01	-0.087	09:50	0.087	13:10	0.003	-0.017	-0.033	0.041	-0.031	0.011	0.041	0.02	-0.007
[truncated: 17 more columns]

## Sheet: diff_Komunardu
		theta													t_surf													MRT													PET
		AVG	00-03	03-06	06-09	9-12	12-15	15-18	18-21	21-24	MIN	TIME	MAX	TIME	AVG	00-03	03-06	06-09	9-12	12-15	15-18	18-21	21-24	MIN	TIME	MAX	TIME	AVG	00-03	03-06	06-09	9-12	12-15	15-18	18-21	21-24	MIN	TIME	MAX	TIME	AVG	00-03	03-06	06-09	9-12	12-15	15-18	18-21	21-24
	SA01	-0.107	-0.043	-0.081	-0.111	-0.136	-0.152	-0.149	-0.11	-0.071	-0.44	10:10	0.092	10:00	-0.509	-0.168	-0.175	-0.416	-1.103	-1.054	-0.528	-0.363	-0.267	-1.453	11:30	-0.144	02:30	0.448	-0.088	0.233	1.057	1.423	1.082	0.206	-0.183	-0.145	-0.218	19:10	1.738	11:10	0.138	-0.038	0.037	0.504	0.579	0.263	-0.031	-0.159	-0.054
	SA02	0.091	0.035	0.071	0.097	0.152	0.123	0.101	0.093	0.054	-0.177	11:40	0.447	12:10	0.389	0.129	0.122	0.322	0.943	0.777	0.356	0.27	0.194	0.108	04:50	1.242	11:20	-0.44	0.076	-0.22	-0.971	-1.352	-1.092	-0.228	0.151	0.116	-1.619	11:10	0.181	19:10	-0.134	0.058	-0.066	-0.269	-0.536	-0.405	-0.022	0.099	0.067
	SA03	-0.009	-0.005	0.016	-0.015	0.015	-0.047	-0.039	0.001	0.006	-0.201	13:50	0.211	09:30	-0.033	-0.038	-0.031	-0.022	0.007	-0.05	-0.056	-0.034	-0.038	-0.141	13:10	0.078	12:20	0.057	0.082	0.068	0.063	0.046	0.008	0.037	0.07	0.084	-0.045	13:10	0.105	09:30	0.006	-0.006	0.063	0.016	0.071	-0.088	-0.071	0.001	0.059
	SA04	-0.059	-0.063	-0.067	-0.05	-0.079	-0.035	-0.061	-0.058	-0.055	-0.24	10:30	0.144	09:20	-0.258	-0.263	-0.254	-0.2	-0.301	-0.295	-0.239	-0.244	-0.264	-0.427	13:10	-0.145	09:20	0.328	0.352	0.289	0.291	0.391	0.411	0.314	0.263	0.314	0.243	19:10	0.486	11:50	0.06	0.077	0.045	0.043	-0.007	0.14	0.041	0.03	0.108
	SA05	0.08	0.112	0.129	0.059	0.041	0.04	0.039	0.112	0.107	-0.192	11:40	0.352	10:20	0.34	0.361	0.347	0.269	0.383	0.382	0.298	0.33	0.349	0.22	07:20	0.559	11:20	-0.587	-0.555	-0.501	-0.545	-0.773	-0.864	-0.585	-0.399	-0.478	-0.988	13:10	-0.362	19:10	-0.195	-0.104	-0.093	-0.165	-0.425	-0.37	-0.216	-0.081	-0.102
	SA06	0.004	0.053	0.05	0.017	0.027	-0.019	-0.059	-0.031	-0.01	-0.235	13:50	0.218	08:40	-0.149	-0.087	-0.077	-0.109	-0.27	-0.299	-0.173	-0.098	-0.08	-0.409	12:30	-0.065	00:30	-0.184	-0.157	-0.168	-0.243	-0.217	-0.28	-0.201	-0.095	-0.109	-0.342	14:10	-0.088	19:00	-0.108	-0.015	-0.05	-0.222	-0.14	-0.161	-0.154	-0.067	-0.055
	SA07	-0.028	-0.079	-0.075	-0.102	-0.06	0.01	0.016	0.047	0.02	-0.289	07:30	0.253	11:50	0.168	0.113	0.087	0.119	0.293	0.327	0.178	0.122	0.104	0.059	06:20	0.511	11:50	0.245	0.23	0.224	0.291	0.271	0.322	0.271	0.165	0.182	0.156	19:40	0.405	14:50	0.056	0.025	0.019	0.073	-0.06	0.137	0.103	0.08	0.075
	SA08	0.001	0.008	-0.002	0.012	0.005	0.011	-0.03	0.004	0.004	-0.167	07:30	0.234	08:40	-0.003	0.006	-0.001	0.002	-0.007	-0.009	-0.013	-0.001	0	-0.114	13:10	0.065	10:40	-0.003	0.006	-0.001	0.001	-0.006	-0.015	-0.019	0.005	0.004	-0.102	13:10	0.057	08:40	-0.016	0.018	0.008	-0.033	-0.062	0.022	-0.06	-0.02	0.001
	SA09	-0.001	-0.002	-0.007	0.001	0.024	-0.021	-0.005	0.003	-0.002	-0.263	13:50	0.243	12:00	-0.002	0	-0.005	0.004	0.03	-0.032	-0.011	-0.001	-0.004	-0.098	13:50	0.161	12:10	-0.005	0.003	-0.005	-0.002	0.014	-0.039	-0.014	0.005	0	-0.098	13:50	0.082	12:10	-0.021	0.004	-0.039	-0.001	0.055	-0.103	-0.014	-0.014	-0.055
	SA10	-0.001	0.004	-0.009	0.019	0.005	-0.008	-0.024	0.003	0.002	-0.3	07:20	0.351	08:40	-0.006	0.004	-0.007	0.005	0.005	-0.018	-0.024	-0.007	-0.003	-0.13	10:10	0.078	12:20	-0.023	0.003	-0.017	-0.028	-0.02	-0.068	-0.049	-0.004	0	-0.115	13:50	0.039	08:40	-0.009	0.025	-0.058	0.13	-0.041	-0.062	-0.054	-0.027	0.017
	SA11	-0.005	0.004	0.007	-0.033	-0.005	-0.006	-0.024	0.009	0.004	-0.169	13:50	0.136	13:30	-0.004	0.002	0.002	-0.001	-0.01	-0.014	-0.011	0.001	0.001	-0.082	13:10	0.031	12:20	0.017	0.002	0.013	0.031	0.024	0.05	0.016	0	0	-0.042	08:30	0.094	14:40	-0.022	0.019	0.01	-0.106	-0.021	-0.012	-0.07	-0.012	0.02
	SA12	-0.025	0.049	0.047	-0.074	-0.115	-0.076	-0.064	0.005	0.029	-0.368	10:50	0.215	08:40	-0.174	0.089	0.061	-0.21	-0.62	-0.409	-0.217	-0.09	0.007	-0.771	11:20	0.115	03:10	-0.08	0.1	0.069	-0.131	-0.296	-0.248	-0.154	-0.026	0.047	-0.389	09:10	0.124	02:10	-0.094	0.037	0.039	-0.169	-0.292	-0.214	-0.121	-0.031	0.001
	SA13	-0.001	-0.098	-0.067	0.051	0.076	0.049	0.028	-0.003	-0.048	-0.152	01:50	0.358	08:40	0.152	-0.161	-0.117	0.24	0.664	0.383	0.198	0.067	-0.054	-0.203	02:20	0.786	11:20	0.062	-0.16	-0.124	0.15	0.307	0.231	0.151	0.021	-0.076	-0.201	02:20	0.361	11:20	0.017	-0.121	-0.046	0.084	0.104	0.081	0.056	-0.007	-0.016
	SA14	0.009	0.099	0.09	-0.025	-0.083	-0.064	-0.032	0.029	0.06	-0.334	13:50	0.162	03:40	-0.076	0.214	0.174	-0.107	-0.533	-0.34	-0.12	-0.001	0.104	-0.602	11:40	0.248	02:30	-0.001	0.208	0.173	-0.029	-0.218	-0.202	-0.084	0.033	0.113	-0.269	12:40	0.235	02:30	-0.011	0.118	0.095	0.024	-0.192	-0.138	-0.057	-0.009	0.067
	SA15	-0.024	-0.138	-0.115	0.033	0.089	0.029	0.005	-0.025	-0.072	-0.194	02:50	0.319	08:40	0.061	-0.283	-0.232	0.149	0.624	0.303	0.098	-0.025	-0.15	-0.317	03:30	0.735	11:20	-0.02	-0.269	-0.234	0.051	0.253	0.169	0.058	-0.042	-0.142	-0.307	03:30	0.363	11:20	-0.016	-0.153	-0.118	0.002	0.177	0.035	0.004	-0.046	-0.034
	SA16	-0.04	-0.038	-0.013	-0.01	-0.037	-0.053	-0.05	-0.075	-0.048	-0.217	13:50	0.184	08:40	-0.044	-0.022	-0.021	-0.009	-0.037	-0.073	-0.061	-0.067	-0.058	-0.168	11:40	0.048	09:30	-0.097	-0.077	-0.035	-0.021	-0.069	-0.136	-0.167	-0.153	-0.114	-0.206	15:10	0.01	08:40	-0.073	-0.049	-0.005	-0.029	-0.1	-0.143	-0.079	-0.137	-0.042
	SA17	0.022	0.035	0.006	-0.006	0.023	-0.028	0.033	0.068	0.048	-0.224	13:10	0.16	12:10	0.018	0.02	0.008	0.012	0.013	-0.027	0.019	0.05	0.047	-0.143	13:10	0.119	12:10	0.079	0.084	0.023	0.023	0.056	0.039	0.135	0.156	0.119	-0.056	13:10	0.17	17:40	0.031	0.037	0.006	-0.012	0.056	-0.059	0.067	0.087	0.065
	SA18	-0.025	-0.002	-0.014	-0.011	-0.043	-0.059	-0.057	-0.011	-0.003	-0.302	10:10	0.222	10:00	-0.054	0	-0.012	-0.034	-0.12	-0.141	-0.077	-0.034	-0.013	-0.241	13:10	0.014	01:30	-0.138	0	-0.048	-0.209	-0.379	-0.36	-0.092	-0.018	-0.001	-0.469	13:10	0.012	01:30	-0.019	0.044	0.027	-0.033	-0.05	-0.166	-0.047	0.008	0.066
	SA19	0.024	-0.01	0.014	0.012	0.06	0.049	0.035	0.023	0.006	-0.168	11:40	0.21	08:40	0.062	-0.002	0.004	0.055	0.156	0.152	0.081	0.04	0.012	-0.015	03:30	0.224	10:40	0.18	-0.009	0.052	0.286	0.517	0.462	0.11	0.023	-0.001	-0.021	02:20	0.578	10:40	0.011	-0.066	-0.103	0.089	0.157	0.177	-0.007	-0.045	-0.117
	SA20	-0.011	-0.006	-0.012	-0.015	-0.031	-0.022	-0.007	0.004	0	-0.359	10:10	0.215	08:40	-0.015	-0.001	-0.012	-0.003	-0.034	-0.038	-0.017	-0.005	-0.006	-0.127	10:10	0.049	12:50	-0.01	-0.002	-0.011	-0.008	-0.017	-0.028	-0.007	-0.003	-0.004	-0.089	08:30	0.036	08:40	-0.048	-0.012	-0.066	-0.027	-0.134	-0.065	-0.013	-0.028	-0.042
	SA21	-0.004	0.008	0.001	0.011	-0.016	-0.046	0	0.005	0.008	-0.231	13:00	0.146	08:40	-0.008	0.003	0	0.005	-0.007	-0.047	-0.012	-0.005	-0.002	-0.139	13:10	0.061	09:50	-0.003	0.002	0.001	0.006	-0.002	-0.03	-0.005	-0.001	0.002	-0.095	13:10	0.053	08:40	-0.019	0.007	-0.002	-0.077	-0.018	-0.097	0.008	-0.001	0.026
	SB01	0.006	0.164	0.142	-0.08	-0.074	-0.137	-0.096	0.033	0.093	-0.349	10:10	0.249	01:30	-0.245	0.114	0.098	-0.4	-0.555	-0.848	-0.328	-0.084	0.041	-1.336	13:50	0.153	01:30	-0.448	0.472	0.104	-1.785	-0.648	-2.02	-0.413	0.285	0.421	-3.196	14:00	0.514	01:30	-0.191	0.2	0.108	-0.835	-0.17	-0.91	-0.189	0.105	0.165
	SB02	0.003	-0.145	-0.101	0.046	0.076	0.134	0.091	-0.013	-0.069	-0.258	10:10	0.401	11:50	0.292	-0.082	-0.075	0.594	0.614	0.85	0.354	0.101	-0.021	-0.12	03:20	1.254	08:40	0.436	-0.492	-0.065	2.077	0.632	1.628	0.466	-0.308	-0.453	-0.515	03:00	2.823	08:20	0.327	-0.181	0.08	1.15	0.58	0.89	0.287	-0.07	-0.12
	SB03	0.047	0.009	0.012	0.064	0.081	0.075	0.052	0.054	0.029	-0.12	12:40	0.289	10:00	1.029	0.356	0.375	1.066	2.21	2.141	1.051	0.62	0.415	0.302	02:50	2.833	11:20	-0.361	0.209	-0.015	-0.879	-1.753	-1.006	0.093	0.25	0.215	-2.798	11:10	0.27	19:10	-0.158	0.068	-0.015	-0.326	-0.786	-0.389	0.04	0.106	0.037
	SB04	-0.004	-0.015	-0.011	-0.009	-0.004	0.006	-0.012	0.008	0.006	-0.19	10:50	0.242	10:20	0.396	0.215	0.192	0.4	0.805	0.776	0.384	0.228	0.167	0.148	23:50	1.049	11:10	-0.101	0.068	-0.002	-0.23	-0.511	-0.294	0.04	0.065	0.053	-0.832	11:10	0.082	02:00	-0.054	0.007	-0.03	-0.02	-0.268	-0.159	0.005	0.022	0.011
	SB05	0.048	0.046	0.045	0.049	0.066	0.046	0.052	0.04	0.037	-0.129	12:30	0.319	08:40	0.736	0.356	0.374	0.776	1.378	1.301	0.752	0.524	0.425	0.316	02:40	1.805	11:20	-0.469	-0.15	-0.217	-0.715	-1.477	-1.004	-0.112	-0.004	-0.074	-2.332	11:10	0.027	19:10	-0.187	-0.029	-0.049	-0.313	-0.714	-0.432	0.004	0.021	0.012
	SB06	-0.037	-0.006	-0.021	-0.037	-0.033	-0.079	-0.057	-0.031	-0.028	-0.278	10:10	0.172	11:00	-0.04	-0.005	-0.018	-0.03	-0.052	-0.083	-0.065	-0.037	-0.029	-0.154	10:30	0.016	11:50	0.005	-0.009	-0.006	0.061	0.054	0.015	-0.018	-0.03	-0.026	-0.052	15:10	0.098	08:40	-0.039	0.007	-0.079	0.074	-0.036	-0.131	-0.08	-0.048	-0.017
	SB07	-0.115	-0.089	-0.063	-0.088	-0.179	-0.202	-0.134	-0.086	-0.077	-0.41	12:40	0.133	08:40	-1.024	-0.962	-0.57	-0.229	-0.94	-1.881	-1.391	-1.165	-1.058	-2.488	13:20	0.06	09:10	-0.377	-0.284	-0.17	-0.179	-0.433	-0.771	-0.496	-0.369	-0.318	-1.061	13:20	-0.116	09:20	-0.199	-0.116	-0.082	-0.134	-0.288	-0.399	-0.286	-0.191	-0.096
	SB09	-0.474	-0.328	-0.26	-0.316	-0.727	-0.682	-0.54	-0.524	-0.417	-0.97	11:20	-0.146	06:00	-5.241	-2.931	-2.293	-3.272	-8.781	-9.3	-6.486	-4.956	-3.91	-11.218	12:30	-2.201	04:50	-2.311	-1.168	-0.984	-1.644	-4.124	-4.066	-2.78	-2.096	-1.624	-5.052	12:30	-0.923	04:00	-1.142	-0.455	-0.371	-0.79	-2.286	-2.127	-1.368	-1.007	-0.734
	SB10	0.099	-0.023	0.007	0.04	0.027	0.127	0.304	0.236	0.077	-0.321	10:10	0.493	18:20	1.154	0.339	0.369	1.514	2.828	2.241	1.215	0.578	0.147	0.025	00:00	3.197	10:50	4.319	0.165	1.701	8.055	12.204	9.667	2.509	0.318	-0.066	-0.132	00:00	13.72	10:50	0.494	-1.086	-0.639	1.55	2.892	2.5	0.324	-0.705	-0.888
	SB11	0.028	-0.132	-0.078	-0.005	-0.034	0.086	0.236	0.158	-0.004	-0.357	11:40	0.433	18:20	1.101	0.263	0.311	1.445	2.797	2.234	1.168	0.509	0.08	-0.039	00:00	3.122	12:10	4.246	0.086	1.638	7.958	12.121	9.604	2.449	0.247	-0.134	-0.199	00:00	13.571	10:50	0.416	-1.213	-0.727	1.366	2.841	2.536	0.224	-0.75	-0.953
	SB12	-0.115	-0.001	0.002	-0.046	-0.167	-0.168	-0.226	-0.253	-0.06	-0.451	12:20	0.139	13:30	-0.074	-0.016	-0.078	-0.32	0.042	0.204	-0.171	-0.166	-0.088	-0.365	06:30	0.339	12:30	-0.286	0.004	-0.62	-1.234	0.078	0.456	-0.793	-0.144	-0.035	-1.797	06:00	0.766	12:30	-0.034	0.174	-0.017	-0.312	0.119	0.362	-0.391	-0.177	-0.027
	SB13	-0.059	-0.025	-0.018	-0.04	-0.083	-0.094	-0.107	-0.071	-0.035	-0.26	12:30	0.074	08:10	-0.122	-0.027	-0.065	-0.231	-0.093	-0.137	-0.243	-0.112	-0.063	-0.298	16:30	0.002	10:40	-0.322	-0.017	-0.359	-0.736	-0.274	-0.411	-0.686	-0.069	-0.028	-1.169	16:40	0.009	02:10	-0.127	0.067	-0.023	-0.315	-0.199	-0.199	-0.284	-0.026	-0.039
	SB14	-0.071	-0.01	-0.019	-0.042	-0.059	-0.121	-0.151	-0.118	-0.049	-0.402	13:50	0.168	09:30	-0.177	-0.035	-0.082	-0.361	-0.116	-0.169	-0.379	-0.175	-0.097	-0.472	16:20	0.006	12:10	-0.499	-0.016	-0.5	-1.197	-0.405	-0.641	-1.077	-0.113	-0.044	-1.693	06:00	0.021	01:30	-0.183	0.117	-0.041	-0.516	-0.15	-0.319	-0.477	-0.076	-0.003
	SB15	-0.21	-0.052	-0.072	-0.164	-0.338	-0.385	-0.342	-0.235	-0.092	-0.59	12:40	0.021	01:30	-1.669	-0.734	-0.702	-1.935	-3.85	-2.975	-1.833	-0.908	-0.415	-4.317	11:40	-0.282	00:00	-3.712	-0.293	-1.639	-6.21	-10.457	-7.316	-3.248	-0.476	-0.061	-11.537	11:40	0.016	00:00	-1.295	0.136	-0.307	-2.337	-3.991	-2.813	-1.221	-0.031	0.205
	SB16	0.028	0.016	0.03	0.027	0.027	0.047	0.022	0.044	0.015	-0.183	10:10	0.284	12:10	0.34	0.216	0.187	0.365	0.717	0.653	0.334	0.172	0.079	0.052	23:40	1.074	12:10	0.924	0.082	0.366	1.372	2.648	2.232	0.605	0.093	-0.002	-0.023	23:40	3.073	11:30	0.267	-0.023	0.112	0.252	0.858	0.906	0.125	-0.036	-0.059
	SB17	0.071	0.007	0.036	0.116	0.064	0.078	0.105	0.113	0.051	-0.119	10:30	0.309	09:20	0.033	-0.002	0.001	0.042	0.018	0.046	0.05	0.065	0.041	-0.062	10:30	0.125	12:20	0.024	-0.005	-0.01	0.022	0.014	0.061	0.036	0.05	0.027	-0.114	11:00	0.196	13:40	0.033	-0.008	0.036	0.055	-0.041	0.082	0.057	0.057	0.029
[truncated: 17 more columns]

## Sheet: diff_Streets
		theta													t_surf													MRT													PET
		AVG	00-03	03-06	06-09	9-12	12-15	15-18	18-21	21-24	MIN	TIME	MAX	TIME	AVG	00-03	03-06	06-09	9-12	12-15	15-18	18-21	21-24	MIN	TIME	MAX	TIME	AVG	00-03	03-06	06-09	9-12	12-15	15-18	18-21	21-24	MIN	TIME	MAX	TIME	AVG	00-03	03-06	06-09	9-12	12-15	15-18	18-21	21-24
	SA01	-0.101	-0.039	-0.08	-0.113	-0.126	-0.154	-0.131	-0.1	-0.065	-0.45	10:10	0.105	12:30	-0.372	-0.117	-0.121	-0.397	-0.72	-0.719	-0.453	-0.265	-0.188	-0.963	11:30	-0.081	04:40	0.485	-0.071	0.278	1.059	1.414	1.134	0.339	-0.15	-0.122	-0.191	19:10	1.549	11:10	0.182	-0.029	0.09	0.53	0.6	0.401	0.017	-0.129	-0.022
	SA02	0.081	0.031	0.067	0.115	0.122	0.086	0.102	0.078	0.047	-0.232	11:40	0.375	10:20	0.306	0.099	0.092	0.38	0.65	0.534	0.348	0.202	0.143	0.048	04:50	0.786	11:10	-0.469	0.064	-0.263	-0.967	-1.329	-1.128	-0.342	0.118	0.093	-1.431	11:10	0.149	19:30	-0.187	0.048	-0.088	-0.236	-0.676	-0.565	-0.07	0.068	0.026
	SA03	-0.005	0.002	0.02	-0.012	0.021	-0.05	-0.031	0.002	0.009	-0.215	08:00	0.169	09:30	0.058	0.053	0.054	0.078	0.084	0.034	0.049	0.056	0.054	-0.044	13:10	0.172	08:40	-0.045	0.001	-0.005	-0.045	-0.077	-0.121	-0.085	-0.021	-0.006	-0.177	14:10	0.043	05:40	-0.037	-0.01	0.06	0.014	-0.052	-0.174	-0.114	-0.031	0.009
	SA04	-0.064	-0.068	-0.07	-0.053	-0.089	-0.057	-0.052	-0.064	-0.061	-0.234	13:10	0.117	14:50	-0.264	-0.226	-0.222	-0.232	-0.336	-0.321	-0.279	-0.252	-0.246	-0.449	11:30	-0.195	06:20	0.326	0.311	0.27	0.315	0.382	0.42	0.352	0.266	0.29	0.224	05:10	0.483	11:50	0.048	0.046	-0.036	0.088	-0.077	0.144	0.06	0.056	0.101
	SA05	0.095	0.125	0.136	0.079	0.063	0.047	0.067	0.124	0.122	-0.244	11:40	0.405	10:20	0.604	0.534	0.49	0.561	0.689	0.696	0.685	0.601	0.572	0.461	05:20	0.859	11:20	-0.887	-0.746	-0.691	-0.881	-1.125	-1.246	-1.001	-0.69	-0.716	-1.343	13:10	-0.654	19:30	-0.318	-0.113	-0.218	-0.308	-0.504	-0.588	-0.363	-0.215	-0.232
	SA06	0.004	0.045	0.049	0.022	0.02	-0.023	-0.038	-0.033	-0.009	-0.188	10:10	0.192	08:40	-0.244	-0.129	-0.115	-0.235	-0.402	-0.463	-0.305	-0.171	-0.13	-0.578	12:40	-0.091	04:40	-0.217	-0.166	-0.183	-0.243	-0.298	-0.344	-0.235	-0.139	-0.13	-0.388	12:40	-0.118	23:00	-0.124	-0.044	-0.067	-0.196	-0.214	-0.218	-0.139	-0.065	-0.047
	SA07	-0.035	-0.081	-0.073	-0.097	-0.076	-0.014	0.006	0.036	0.018	-0.284	09:10	0.164	11:50	0.269	0.163	0.121	0.263	0.418	0.462	0.345	0.211	0.168	0.091	05:20	0.551	11:50	0.231	0.216	0.175	0.24	0.234	0.28	0.299	0.206	0.198	-0.002	05:20	0.353	14:50	0.056	0.009	-0.01	0.128	-0.064	0.066	0.137	0.096	0.087
	SA08	0.001	0.004	-0.007	0.01	0.005	0.013	-0.018	0.002	0.001	-0.259	10:10	0.218	10:20	0	0	-0.007	-0.004	0.006	-0.001	0.003	0.002	-0.001	-0.114	13:10	0.085	08:40	-0.001	0.001	-0.006	-0.001	0.001	-0.003	-0.002	0.005	0	-0.086	13:10	0.057	08:40	-0.033	-0.002	-0.077	-0.06	-0.056	0	-0.028	-0.01	-0.034
	SA09	-0.007	-0.004	-0.006	-0.01	0.013	-0.044	0.001	0	-0.004	-0.21	13:50	0.277	12:00	-0.01	-0.006	-0.004	0.004	0	-0.059	-0.005	0.002	-0.009	-0.155	12:40	0.126	10:30	-0.007	-0.003	-0.004	-0.001	-0.002	-0.04	-0.006	0.003	-0.006	-0.088	14:10	0.076	10:30	-0.041	-0.025	-0.041	0.035	-0.076	-0.163	0.016	0.001	-0.072
	SA10	-0.002	0	-0.008	0.018	0.011	-0.013	-0.018	-0.002	0	-0.332	10:10	0.33	08:40	-0.005	0.001	-0.002	-0.003	0.018	-0.028	-0.016	-0.006	-0.001	-0.133	10:10	0.131	08:40	-0.019	0.001	-0.01	-0.026	-0.024	-0.056	-0.032	-0.004	-0.001	-0.118	10:10	0.056	08:40	-0.021	0	-0.038	-0.006	0.011	-0.078	-0.048	-0.022	0.013
	SA11	-0.008	-0.002	0.006	-0.021	-0.01	-0.017	-0.023	0.005	0	-0.204	08:30	0.139	08:40	-0.002	-0.008	0.001	0.011	-0.017	-0.001	-0.007	0.004	0.001	-0.117	11:30	0.074	08:40	0.014	-0.006	0.011	0.031	0.024	0.039	0.013	0.001	-0.003	-0.026	13:10	0.083	08:40	-0.018	-0.021	-0.005	-0.001	-0.07	-0.009	-0.037	-0.005	0.006
	SA12	-0.027	0.045	0.029	-0.082	-0.119	-0.08	-0.048	0.009	0.031	-0.328	12:40	0.209	12:30	-0.154	0.162	0.085	-0.342	-0.611	-0.457	-0.191	0.017	0.102	-0.717	11:20	0.188	01:30	-0.078	0.126	0.072	-0.167	-0.33	-0.278	-0.133	0.01	0.08	-0.386	11:30	0.15	02:10	-0.093	0.036	-0.046	-0.156	-0.325	-0.205	-0.075	-0.001	0.025
	SA13	-0.008	-0.104	-0.073	0.064	0.062	0.024	0.029	-0.014	-0.053	-0.161	10:10	0.347	08:40	0.128	-0.261	-0.156	0.413	0.644	0.428	0.185	-0.059	-0.168	-0.288	02:50	0.747	11:20	0.056	-0.205	-0.142	0.202	0.344	0.27	0.141	-0.032	-0.128	-0.24	02:50	0.413	11:20	0.009	-0.171	-0.088	0.178	0.112	0.063	0.08	-0.028	-0.071
	SA14	0.007	0.095	0.081	-0.021	-0.081	-0.08	-0.027	0.031	0.062	-0.292	13:50	0.171	07:40	-0.072	0.28	0.196	-0.247	-0.524	-0.418	-0.141	0.094	0.185	-0.623	11:40	0.309	02:20	0.003	0.242	0.191	-0.069	-0.241	-0.235	-0.088	0.07	0.151	-0.316	12:40	0.267	02:10	-0.038	0.088	0.085	0.001	-0.241	-0.217	-0.09	0.006	0.066
	SA15	-0.024	-0.139	-0.113	0.052	0.088	0.026	0.006	-0.036	-0.077	-0.228	02:50	0.231	09:50	0.053	-0.368	-0.253	0.341	0.609	0.371	0.118	-0.144	-0.249	-0.401	01:40	0.702	11:10	-0.024	-0.32	-0.26	0.114	0.285	0.208	0.077	-0.098	-0.199	-0.352	02:50	0.375	11:20	-0.013	-0.154	-0.115	0.111	0.134	0.016	0.044	-0.064	-0.074
	SA16	-0.04	-0.039	-0.025	0.005	-0.036	-0.073	-0.033	-0.07	-0.047	-0.21	11:40	0.183	08:40	-0.04	-0.026	-0.031	0.016	-0.03	-0.09	-0.049	-0.059	-0.054	-0.187	13:40	0.13	08:40	-0.099	-0.085	-0.046	-0.011	-0.072	-0.148	-0.154	-0.157	-0.117	-0.202	13:40	0.048	08:40	-0.082	-0.063	-0.086	0.074	-0.14	-0.203	-0.075	-0.128	-0.034
	SA17	0.017	0.032	-0.001	-0.016	0.019	-0.038	0.035	0.061	0.046	-0.215	13:10	0.115	07:40	0.016	0.016	0.005	0.006	-0.002	-0.034	0.036	0.051	0.047	-0.12	12:40	0.108	08:40	0.082	0.083	0.025	0.022	0.05	0.058	0.143	0.156	0.115	-0.016	06:10	0.172	17:40	0.008	0.018	-0.048	-0.025	0.001	-0.088	0.068	0.081	0.055
	SA18	-0.018	-0.01	-0.017	0.01	-0.047	-0.048	-0.024	-0.007	-0.002	-0.394	10:10	0.305	10:00	-0.035	-0.011	-0.019	-0.009	-0.108	-0.09	-0.019	-0.015	-0.008	-0.232	11:20	0.04	16:50	-0.087	-0.007	-0.042	-0.128	-0.23	-0.214	-0.062	-0.012	-0.003	-0.298	11:20	0.014	01:30	-0.035	-0.015	-0.04	0.043	-0.173	-0.094	0.029	-0.013	-0.02
	SA19	0.014	-0.002	0.018	0.007	0.029	0.019	0.026	0.012	0.004	-0.26	11:40	0.214	09:50	0.043	0.011	0.017	0.057	0.083	0.078	0.066	0.026	0.01	-0.041	11:40	0.14	10:00	0.111	0.003	0.05	0.196	0.275	0.253	0.1	0.017	-0.001	-0.014	23:40	0.305	11:00	0.014	-0.009	-0.022	0.097	0.01	0.086	0.037	-0.03	-0.054
	SA20	-0.01	-0.007	-0.006	-0.01	-0.023	-0.03	0.001	-0.002	-0.003	-0.428	10:10	0.194	10:20	-0.026	-0.01	-0.017	-0.004	-0.04	-0.061	-0.035	-0.02	-0.018	-0.136	11:00	0.044	06:20	-0.014	-0.007	-0.011	-0.004	-0.019	-0.035	-0.016	-0.011	-0.011	-0.08	14:10	0.031	08:40	-0.025	-0.02	-0.052	0.048	-0.063	-0.044	-0.014	-0.018	-0.038
	SA21	-0.003	0.008	-0.003	0.02	-0.022	-0.049	0.012	0.002	0.007	-0.219	13:00	0.182	08:40	0.032	0.016	0.014	0.049	0.054	0.024	0.053	0.024	0.019	-0.033	14:10	0.186	08:40	0.014	0.009	0.009	0.025	0.021	0.001	0.023	0.012	0.01	-0.033	14:10	0.106	08:40	-0.016	0.03	-0.035	-0.006	-0.078	-0.091	0.04	-0.012	0.021
	SB01	0.026	0.187	0.149	-0.004	-0.067	-0.116	-0.056	0.029	0.089	-0.342	10:10	0.303	01:30	-0.137	0.22	0.1	-0.245	-0.599	-0.562	-0.156	0.025	0.121	-0.745	13:50	0.305	01:30	-0.31	0.557	-0.256	-1.055	-0.895	-1.221	-0.442	0.36	0.474	-1.836	13:50	0.632	01:30	0.087	0.451	0.059	-0.084	-0.062	-0.194	0.047	0.244	0.234
	SB02	-0.018	-0.134	-0.112	-0.003	0.037	0.074	0.084	-0.02	-0.069	-0.379	10:10	0.384	11:50	0.195	-0.145	-0.021	0.396	0.561	0.557	0.288	0.015	-0.09	-0.182	03:00	0.77	09:20	0.336	-0.523	0.343	1.223	0.816	1.04	0.646	-0.364	-0.49	-0.548	03:00	1.6	08:20	0.065	-0.259	0.106	0.436	0.166	0.278	0.22	-0.23	-0.195
	SB03	0.024	0.008	0.003	0.049	0.045	0.018	0.022	0.03	0.015	-0.155	12:40	0.313	10:00	0.454	0.165	0.168	0.489	0.977	0.917	0.46	0.274	0.182	0.116	02:50	1.227	11:20	-0.167	0.1	-0.009	-0.399	-0.787	-0.481	0.024	0.115	0.097	-1.241	11:10	0.13	01:30	-0.081	0.054	-0.023	-0.121	-0.371	-0.234	0.002	0.04	0.004
	SB04	-0.05	-0.02	-0.036	-0.069	-0.083	-0.092	-0.065	-0.023	-0.014	-0.267	10:10	0.199	10:20	-0.6	-0.058	-0.185	-0.901	-1.1	-1.154	-0.879	-0.336	-0.189	-1.241	12:40	-0.024	02:20	0.364	-0.103	0.153	0.969	0.976	0.912	0.343	-0.185	-0.154	-0.202	19:10	1.105	06:50	0.145	-0.039	-0.01	0.577	0.381	0.298	0.133	-0.106	-0.071
	SB05	0.03	0.049	0.038	0.058	0.017	-0.008	0.03	0.022	0.03	-0.266	12:20	0.351	10:20	-0.066	0.14	0.106	-0.21	-0.297	-0.39	-0.203	0.134	0.195	-0.465	12:40	0.235	23:10	-0.393	-0.432	-0.28	-0.19	-0.535	-0.479	-0.382	-0.428	-0.419	-0.91	11:10	-0.019	06:50	-0.133	-0.084	-0.081	0.061	-0.316	-0.29	-0.08	-0.149	-0.125
	SB06	-0.092	-0.025	-0.042	-0.101	-0.135	-0.19	-0.129	-0.062	-0.048	-0.463	10:10	0.05	11:00	-1.358	-0.399	-0.529	-1.818	-2.432	-2.513	-1.827	-0.821	-0.528	-2.698	12:40	-0.352	03:20	0.596	-0.225	0.222	1.593	1.789	1.544	0.464	-0.34	-0.276	-0.378	19:10	1.889	11:00	0.233	-0.11	0.052	0.811	0.749	0.53	0.135	-0.19	-0.116
	SB07	-0.088	-0.075	-0.034	-0.077	-0.132	-0.165	-0.098	-0.067	-0.055	-0.348	13:10	0.09	15:30	-0.775	-0.684	-0.372	-0.271	-0.852	-1.301	-1.103	-0.875	-0.745	-1.576	13:10	-0.051	05:50	-0.274	-0.241	-0.117	-0.091	-0.286	-0.469	-0.398	-0.325	-0.267	-0.604	13:20	0.011	05:50	-0.139	-0.092	0.02	-0.032	-0.248	-0.317	-0.224	-0.176	-0.044
	SB09	-0.436	-0.319	-0.256	-0.339	-0.634	-0.645	-0.494	-0.445	-0.354	-0.891	12:20	-0.171	05:40	-4.614	-2.7	-1.932	-3.284	-7.213	-7.706	-6.149	-4.475	-3.451	-8.652	12:30	-1.64	05:40	-1.949	-1.152	-0.844	-1.391	-3.043	-3.125	-2.546	-1.976	-1.516	-3.585	12:30	-0.713	05:20	-0.979	-0.456	-0.328	-0.65	-1.741	-1.719	-1.343	-0.952	-0.639
	SB10	0.081	0.029	0.037	0.049	0.033	0.064	0.198	0.172	0.068	-0.421	12:20	0.343	09:40	0.957	0.475	0.439	1.214	1.907	1.69	1.096	0.562	0.27	0.174	00:00	2.127	10:50	2.73	0.272	1.348	5.078	6.813	5.76	2.157	0.348	0.064	0.008	00:00	7.443	10:50	0.726	-0.117	0.223	1.569	1.902	1.932	0.795	-0.157	-0.343
	SB11	-0.002	-0.087	-0.05	-0.019	-0.034	0.002	0.115	0.078	-0.023	-0.398	12:20	0.272	09:40	0.745	0.19	0.304	1.119	1.764	1.496	0.82	0.267	0.004	-0.086	00:00	1.891	10:50	2.476	0.096	1.186	4.757	6.422	5.388	1.899	0.162	-0.101	-0.154	00:00	7.011	10:50	0.571	-0.266	0.149	1.169	1.707	1.829	0.669	-0.282	-0.411
	SB12	-0.32	-0.062	-0.069	-0.284	-0.484	-0.535	-0.585	-0.415	-0.132	-0.891	12:20	0.041	02:00	-3.213	-0.885	-1.092	-4.996	-5.727	-5.904	-4.505	-1.736	-0.861	-6.206	14:20	-0.547	03:20	-5.808	-0.386	-3.56	-11.787	-10.22	-11.243	-7.939	-0.994	-0.333	-12.349	07:50	-0.164	00:00	-2.088	0.58	-0.49	-4.621	-4.196	-4.641	-3.337	-0.368	0.365
	SB13	-0.143	-0.042	-0.035	-0.135	-0.214	-0.26	-0.253	-0.137	-0.065	-0.491	10:10	0.033	01:30	-1.767	-0.385	-0.612	-2.861	-3.174	-3.368	-2.492	-0.854	-0.391	-3.539	14:10	-0.208	03:20	-3.3	-0.177	-2.462	-6.503	-5.575	-6.293	-4.791	-0.463	-0.135	-6.978	07:30	-0.059	00:00	-1.176	0.422	-0.426	-2.645	-2.317	-2.565	-1.902	-0.141	0.166
	SB14	-0.253	-0.06	-0.069	-0.261	-0.353	-0.453	-0.472	-0.249	-0.109	-0.669	10:10	0.019	01:30	-3.06	-0.792	-1.039	-5.034	-5.098	-5.549	-4.548	-1.627	-0.796	-6.13	14:50	-0.484	03:20	-5.592	-0.364	-3.572	-11.556	-8.966	-10.852	-8.21	-0.896	-0.317	-12.596	14:50	-0.162	00:00	-2.117	0.462	-0.63	-4.729	-3.779	-4.667	-3.555	-0.344	0.304
	SB15	-0.313	-0.053	-0.08	-0.316	-0.478	-0.561	-0.57	-0.318	-0.127	-0.799	10:10	0.046	01:20	-3.698	-1.085	-1.298	-5.71	-6.69	-6.743	-5.171	-1.952	-0.934	-6.937	14:50	-0.623	00:00	-6.982	-0.473	-4.063	-13.738	-13.297	-13.744	-9.163	-1.06	-0.32	-14.825	07:30	-0.153	00:00	-2.524	0.589	-0.633	-5.492	-5.375	-5.692	-3.811	-0.249	0.469
	SB16	0.013	0.009	0.023	0.007	0.019	-0.009	0.013	0.028	0.01	-0.273	10:10	0.222	11:50	0.24	0.161	0.125	0.291	0.472	0.402	0.272	0.132	0.064	0.036	00:00	0.605	11:50	0.571	0.073	0.216	0.939	1.478	1.322	0.461	0.08	0.003	-0.015	23:40	1.631	10:50	0.189	0.072	0.118	0.217	0.461	0.485	0.197	0.003	-0.039
	SB17	0.07	0.006	0.039	0.113	0.053	0.067	0.115	0.113	0.053	-0.092	10:30	0.232	08:40	0.03	-0.005	0	0.059	0.012	0.012	0.058	0.064	0.039	-0.103	10:30	0.124	08:40	0.018	-0.006	-0.018	0.033	0.006	0.019	0.042	0.048	0.024	-0.073	04:50	0.09	17:00	0.026	-0.014	-0.005	0.121	-0.076	-0.009	0.09	0.07	0.028
[truncated: 17 more columns]

[truncated: 6 more sheets: diff_Courtyards, rel_Delnicka, rel_Domain, rel_Komunardu, rel_Streets, rel_Courtyards]
