# Supplementary material for: Sensitivity analysis of the PALM model system 6.0 in the urban environment
Source: Copernicus journal article supplement (doi:10.5194/gmd-14-4443-2021), 2021-07-20
Supplement: Supplementary file [file gmd-14-4443-2021-supplement-title-page.pdf › gmd-14-4443-2021-supplement-title-page.pdf]

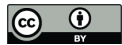

## *Supplement of*

# **Sensitivity analysis of the PALM model system 6.0 in the urban environment**

**Michal Belda et al.**

*Correspondence to:* Michal Belda ([michal.belda@mff.cuni.cz](mailto:michal.belda@mff.cuni.cz))

- [gmd-14-4443-2021-supplement-title-page.pdf](#)
- [FigS01-POIs-Delnicka.captioned.jpg](#)
- [FigS02-POIs-Komunardu.captioned.jpg](#)
- [FigS03-POIs-Other.captioned.jpg](#)
- [FigS04-POIs-Crossroad.captioned.jpg](#)
- [FigS05-Selection-Domain.captioned.jpg](#)
- [FigS06-Selection-Delnicka.captioned.jpg](#)
- [FigS07-Selection-Komunardu.captioned.jpg](#)
- [FigS08-Selection-Courtyards-label.captioned.jpg](#)
- [FigS09-Selection-Streets.captioned.jpg](#)
- [FigS10-PM25-emissions-in-the-domain.captioned.png](#)
- [FigS11-Sensitivity-of-Tsurf.captioned.png](#)
- [FigS12-Sensitivity-of-MRT.captioned.png](#)
- [FigS13-Sensitivity-of-PET.captioned.png](#)
- [FigS14-Sensitivity-of-PM25.captioned.png](#)
- [FigS15-Net-radiation.captioned.png](#)
- [TableS01.csv](#)
- [TableS01.xlsx](#)
- [TableS02.xlsx](#)
- [list-of-figures.txt](#)

The copyright of individual parts of the supplement might differ from the article licence.
